# Supplementary material for: Metabolomic Profiling of Submaximal Exercise at a Standardised Relative Intensity in Healthy Adults
Source: PubMed Central journal article supplement (PMC4812338; doi:10.3390/metabo6010009), 2016-02-26
Supplement: metabolites-06-00009-s001.pdf [file metabolites-06-00009-s001.pdf]

# Supplementary Materials: Metabolomic Profiling of Pre- and Post-Exercise Urine Samples as a Predictor of VO<sub>2</sub>max

Ali Muhsen Ali, Mia Burleigh, Evangelia Daskalaki, Tong Zhang, Chris Easton and David G. Watson

**Table S1.** Comparison of D1S3 and D2S3 sample to the other samples on days 1 and 2. na = not detected.

| m/z     | Rt min | Metabolite                                 | p-Value |       | Ratio  |       | P value |      | Ratio  |       | P value |      | Ratio |      | P value |      | Ratio |      | P value |      | Ratio |      |      |      |      |      |      |
|---------|--------|--------------------------------------------|---------|-------|--------|-------|---------|------|--------|-------|---------|------|-------|------|---------|------|-------|------|---------|------|-------|------|------|------|------|------|------|
|         |        |                                            | D2S3    | D2S1  | D2S3   | D2S1  | D2S3    | D2S2 | D2S3   | D2S2  | D2S3    | D2S4 | D2S3  | D2S4 | D2S3    | D2S5 | D1S3  | D1S1 | D1S3    | D1S2 | D1S3  | D1S4 | D1S3 | D1S4 | D1S3 | D1S5 | D1S3 |
| 137.046 | 10.8   | Hypoxanthine                               | <0.001  | 3.75  | <0.001 | 3.46  | <0.001  | 5.20 | <0.001 | 5.93  | 0.516   | 0.83 | 0.374 | 0.71 | 0.679   | 0.85 | 0.772 | 0.90 |         |      |       |      |      |      |      |      |      |
| 152.057 | 13.1   | Guanine                                    | 0.018   | 2.56  | 0.009  | 2.96  | 0.002   | 6.01 | 0.006  | 3.52  | na      | na   | na    | na   | na      | na   | na    | na   |         |      |       |      |      |      |      |      |      |
| 178.072 | 10.8   | Methyl-H2-pterin                           | <0.001  | 3.94  | 0.000  | 3.46  | 0.000   | 5.42 | 0.000  | 6.09  | 0.564   | 0.85 | 0.379 | 0.72 | 0.643   | 0.83 | 0.729 | 0.88 |         |      |       |      |      |      |      |      |      |
| 253.093 | 9.2    | Deoxyinosine                               | 0.009   | 4.97  | na     | na    | na      | na   | na     | na    | na      | na   | na    | na   | na      | na   | na    | na   |         |      |       |      |      |      |      |      |      |
| 165.042 | 13.8   | Methylxanthine                             | 0.030   | 0.77  | 0.254  | 1.16  | 0.900   | 0.99 | 0.421  | 1.09  | 0.089   | 0.79 | 0.916 | 1.02 | 0.958   | 0.99 | 0.532 | 0.90 |         |      |       |      |      |      |      |      |      |
| 165.042 | 8.9    | Methylxanthine                             | 0.035   | 0.67  | 0.135  | 1.41  | 0.112   | 1.45 | 0.741  | 0.93  | 0.068   | 0.74 | 0.699 | 1.07 | 0.998   | 1.00 | 0.533 | 0.90 |         |      |       |      |      |      |      |      |      |
| 167.021 | 13.5   | Urate                                      | 0.015   | 0.75  | 0.688  | 0.96  | 0.663   | 0.95 | 0.931  | 0.99  | <0.001  | 0.53 | 0.333 | 0.82 | 0.491   | 0.88 | 0.023 | 0.68 |         |      |       |      |      |      |      |      |      |
| 181.037 | 10.8   | 1-Methyluric acid                          | 0.008   | 0.59  | 0.264  | 1.23  | 0.109   | 1.37 | 0.997  | 1.00  | 0.012   | 0.56 | 0.941 | 0.98 | 0.993   | 1.00 | 0.333 | 0.80 |         |      |       |      |      |      |      |      |      |
| 269.088 | 11.5   | inosine                                    | 0.025   | 16.27 | 0.040  | 7.29  | na      | na   | 0.032  | 9.78  | 0.947   | 0.97 | 0.667 | 1.24 | 0.331   | 1.70 | 0.477 | 1.47 |         |      |       |      |      |      |      |      |      |
| 285.083 | 13.1   | Xanthosine                                 | 0.011   | 2.33  | 0.002  | 3.98  | 0.002   | 3.93 | 0.012  | 2.44  | 0.012   | 0.51 | 0.350 | 0.74 | 0.290   | 0.71 | 0.183 | 0.64 |         |      |       |      |      |      |      |      |      |
| 296.135 | 17.7   | N6,N6-Dimethyladenosine                    | 0.197   | 2.39  | 0.104  | 3.66  | 0.047   | 9.09 | 0.036  | 19.29 | 0.002   | 0.49 | 0.192 | 0.77 | 0.508   | 0.90 | 0.350 | 0.85 |         |      |       |      |      |      |      |      |      |
| 202.109 | 5.8    | Hydroxyhepanoylglycine                     | 0.003   | 1.76  | 0.001  | 2.12  | 0.006   | 1.81 | 0.002  | 1.86  | 0.238   | 1.28 | 0.981 | 1.00 | 0.574   | 0.87 | 0.165 | 0.75 |         |      |       |      |      |      |      |      |      |
| 218.139 | 6.0    | Propanoylcarnitine                         | 0.032   | 0.36  | 0.048  | 10.71 | 0.153   | 3.11 | 0.277  | 2.29  | 0.095   | 0.73 | 0.363 | 1.12 | 0.143   | 0.76 | 0.009 | 0.71 |         |      |       |      |      |      |      |      |      |
| 248.149 | 12.1   | Hydroxybutyrylcarnitine                    | 0.414   | 1.21  | 0.059  | 1.40  | 0.886   | 1.03 | 0.350  | 0.82  | 0.304   | 0.82 | 0.464 | 0.86 | 0.359   | 0.78 | 0.074 | 0.64 |         |      |       |      |      |      |      |      |      |
| 274.201 | 6.9    | Heptanoylcarnitine                         | 0.220   | 1.21  | 0.003  | 1.75  | 0.014   | 1.53 | 0.465  | 1.11  | 0.120   | 0.78 | 0.547 | 0.90 | 0.741   | 0.94 | 0.626 | 0.91 |         |      |       |      |      |      |      |      |      |
| 314.234 | 5.6    | Decanoyl carnitine                         | 0.010   | 1.56  | 0.000  | 2.05  | 0.001   | 2.15 | 0.007  | 1.74  | 0.079   | 0.68 | 0.391 | 0.82 | 0.742   | 0.91 | 0.659 | 0.90 |         |      |       |      |      |      |      |      |      |
| 300.218 | 6.0    | nonanoylcarnitine                          | 0.015   | 1.63  | 0.003  | 2.10  | 0.003   | 2.08 | 0.057  | 1.45  | 0.064   | 0.60 | 0.499 | 0.85 | 0.789   | 0.93 | 0.682 | 0.89 |         |      |       |      |      |      |      |      |      |
| 330.227 | 6.6    | Keto-decanoylcarnitine                     | 0.032   | 1.61  | 0.001  | 2.14  | 0.003   | 2.02 | 0.269  | 1.22  | <0.001  | 0.45 | 0.345 | 0.81 | 0.588   | 0.90 | 0.481 | 0.87 |         |      |       |      |      |      |      |      |      |
| 368.279 | 5.1    | Tetradecadiencarnitine                     | 0.158   | 1.72  | 0.004  | 4.73  | 0.004   | 4.24 | 0.041  | 2.18  | na      | na   | na    | na   | na      | na   | na    | na   |         |      |       |      |      |      |      |      |      |
| 539.25  | 6.7    | Tetrahydroaldosterone-3-glucuronide        | 0.007   | 1.62  | 0.038  | 1.42  | 0.002   | 1.80 | 0.000  | 2.08  | 0.369   | 1.21 | 0.847 | 1.04 | 0.531   | 1.13 | 0.189 | 1.32 |         |      |       |      |      |      |      |      |      |
| 539.25  | 7.9    | Tetrahydroaldosterone-3-glucuronide        | 0.157   | 1.36  | 0.009  | 1.74  | 0.007   | 1.80 | 0.002  | 1.95  | 0.699   | 1.09 | 0.616 | 0.88 | 0.618   | 1.11 | 0.335 | 1.23 |         |      |       |      |      |      |      |      |      |
| 413.2   | 4.2    | Tetrahydrocorticosterone sulfate or isomer | 0.124   | 1.37  | 0.412  | 1.19  | 0.023   | 1.72 | 0.032  | 1.65  | 0.672   | 1.10 | 0.980 | 0.99 | 0.198   | 1.34 | 0.053 | 1.56 |         |      |       |      |      |      |      |      |      |
| 367.158 | 3.9    | Hydroxyandrostene sulfate                  | 0.037   | 1.57  | 0.806  | 0.95  | 0.171   | 1.40 | 0.147  | 1.44  | 0.319   | 1.23 | 0.453 | 0.87 | 0.208   | 1.28 | 0.031 | 1.50 |         |      |       |      |      |      |      |      |      |
| 405.265 | 5.6    | Dihydroxy-oxo-cholanate                    | 0.004   | 0.44  | 0.783  | 0.92  | 0.144   | 1.58 | 0.437  | 1.21  | 0.078   | 0.51 | 0.869 | 0.93 | 0.765   | 1.15 | 0.297 | 0.61 |         |      |       |      |      |      |      |      |      |
| 583.312 | 10.3   | Cholicacidglucuronide                      | 0.000   | 0.27  | 0.246  | 0.61  | 0.657   | 1.23 | 0.347  | 1.56  | 0.006   | 0.17 | 0.775 | 0.79 | 0.676   | 1.49 | 0.120 | 0.34 |         |      |       |      |      |      |      |      |      |
| 583.312 | 11.5   | Cholicacidglucuronide                      | 0.003   | 0.23  | 0.262  | 0.60  | 0.447   | 1.73 | 0.754  | 1.23  | 0.018   | 0.32 | 0.539 | 0.74 | 0.964   | 0.98 | 0.108 | 0.44 |         |      |       |      |      |      |      |      |      |
| 173.092 | 13.3   | Glycylproline                              | <0.001  | 0.54  | 0.158  | 0.83  | 0.002   | 0.51 | 0.057  | 0.70  | 0.820   | 1.06 | 0.265 | 1.41 | 0.886   | 0.96 | 0.930 |      |         |      |       |      |      |      |      |      |      |
| 187.109 | 13.6   | Glycyl-leucine                             | <0.001  | 0.71  | 0.463  | 0.91  | 0.305   | 0.89 | 0.997  | 1.00  | 0.006   | 0.70 | 0.079 | 0.78 | 0.020   | 0.73 | 0.050 | 0.80 |         |      |       |      |      |      |      |      |      |

Table S1. Cont.

| m/z     | Rt<br>min | Metabolite                                        | p-Value      | Ratio        | P value      | Ratio        | P value      | Ratio        | P value      | Ratio        | P value      | Ratio        | P value      | Ratio        | P value       | Ratio        | P value       | Ratio        |
|---------|-----------|---------------------------------------------------|--------------|--------------|--------------|--------------|--------------|--------------|--------------|--------------|--------------|--------------|--------------|--------------|---------------|--------------|---------------|--------------|
|         |           |                                                   | D2S3<br>D2S1 | D2S3<br>D2S1 | D2S3<br>D2S2 | D2S3<br>D2S2 | D2S3<br>D2S4 | D2S3<br>D2S4 | D2S3<br>D2S5 | D2S3<br>D2S5 | D1S3<br>D1S1 | D1S3<br>D2S1 | D1S3<br>D1S2 | D1S3<br>D1S2 | D1 S3<br>D1S4 | D1S3<br>D1S4 | D1 S3<br>D1S5 | D1S3<br>D1S5 |
| 87.0092 | 8.6       | Pyruvate                                          | 0.256        | 1.18         | 0.013        | 1.45         | 0.076        | 1.29         | 0.150        | 1.23         | 0.017        | 0.57         | 0.485        | 0.82         | 0.288         | 0.81         | 0.490         | 0.87         |
| 89.0242 | 10.2      | (R)-Lactate                                       | 0.018        | 2.19         | 0.106        | 1.58         | 0.234        | 1.35         | 0.078        | 1.63         | 0.867        | 1.04         | 0.161        | 0.57         | 0.137         | 0.71         | 0.708         | 0.91         |
| 101.024 | 12.7      | 2-Oxobutanoate                                    | 0.030        | 1.21         | 0.250        | 1.12         | 0.639        | 0.97         | 0.341        | 1.09         | 0.690        | 0.95         | 0.429        | 0.93         | 0.772         | 0.97         | 0.519         | 0.95         |
| 104.071 | 14.9      | 4-Aminobutanoate                                  | 0.000        | 0.74         | 0.148        | 0.90         | 0.114        | 0.88         | 0.042        | 0.85         | 0.003        | 0.80         | 0.784        | 0.98         | 0.502         | 0.94         | 0.172         | 0.90         |
| 182.997 | 17.0      | hydroxybutyric<br>acid sulfate                    | <0.001       | 2.17         | 0.000        | 1.58         | 0.001        | 1.65         | 0.000        | 2.87         | 0.519        | 1.13         | 0.990        | 1.00         | 0.706         | 0.94         | 0.069         | 1.47         |
| 198.113 | 16.8      | L-Metanephrine                                    | 0.082        | 3.00         | 0.130        | 2.40         | 0.522        | 1.43         | 0.032        | 5.78         | 0.074        | 0.76         | 0.311        | 0.81         | 0.251         | 0.81         | 0.206         | 0.71         |
| 246.992 | 12.8      | dihydroxy phenyl acetic<br>acid sulfate or isomer | 0.020        | 1.44         | 0.005        | 1.65         | 0.000        | 2.34         | 0.000        | 1.85         | 0.513        | 1.21         | 0.374        | 1.29         | 0.375         | 1.26         | 0.785         | 1.08         |
| 261.007 | 10.5      | Homovanillicacidsulfate                           | 0.142        | 1.40         | 0.148        | 1.34         | 0.022        | 1.72         | 0.014        | 1.83         | 0.857        | 0.93         | 0.529        | 1.29         | 0.275         | 1.65         | 0.306         | 1.60         |
| 263.023 | 8.5       | hydroxyphenylethylene-gl<br>ycosulfate            | 0.071        | 1.38         | 0.005        | 1.85         | 0.005        | 1.89         | 0.011        | 1.68         | 0.405        | 0.83         | 0.724        | 1.08         | 0.681         | 1.09         | 0.602         | 1.12         |
| 111.02  | 15.3      | Uracil                                            | 0.013        | 1.23         | 0.005        | 1.22         | 0.001        | 1.32         | 0.048        | 1.17         | 0.598        | 0.94         | 0.761        | 0.98         | 0.292         | 1.10         | 0.132         | 1.14         |
| 126.066 | 13.4      | Methylcytosine                                    | 0.137        | 1.22         | 0.011        | 1.47         | 0.001        | 1.77         | 0.003        | 1.60         | 0.059        | 0.74         | 0.517        | 0.91         | 0.565         | 1.07         | 0.935         | 1.01         |
| 155.01  | 10.8      | Orotate                                           | 0.032        | 1.34         | 0.618        | 0.92         | 0.390        | 0.88         | 0.147        | 1.26         | 0.061        | 1.40         | 0.947        | 1.01         | 0.407         | 1.16         | 0.016         | 1.53         |
| 132.077 | 15.4      | Creatine                                          | 0.011        | 0.54         | 0.235        | 1.33         | 0.904        | 1.03         | 0.061        | 0.56         | 0.018        | 0.44         | 0.674        | 0.85         | 0.806         | 0.92         | 0.098         | 0.47         |
| 168.066 | 9.8       | Pyridoxal                                         | 0.021        | 5.50         | 0.019        | 5.58         | 0.391        | 1.44         | 0.971        | 1.02         | 0.875        | 0.94         | 0.471        | 0.78         | 0.047         | 0.48         | 0.152         | 0.48         |
| 175.025 | 16.9      | Ascorbate                                         | 0.062        | 1.27         | 0.309        | 0.84         | 0.399        | 0.89         | 0.195        | 1.23         | 0.404        | 0.80         | 0.954        | 1.02         | 0.121         | 0.66         | 0.231         | 0.63         |
| 220.118 | 9.4       | Pantothenate                                      | 0.008        | 1.40         | 0.002        | 1.57         | 0.041        | 1.41         | 0.019        | 1.54         | 0.937        | 0.99         | 0.516        | 0.90         | 0.214         | 0.84         | 0.524         | 0.89         |
| 240.109 | 13.3      | Dihydrobiopterin                                  | 0.227        | 1.20         | 0.007        | 1.58         | 0.004        | 1.90         | 0.001        | 1.63         | 0.012        | 0.55         | 0.451        | 0.84         | 0.237         | 0.81         | 0.397         | 0.84         |
| 252.074 | 14.7      | Neopterin                                         | 0.016        | 0.61         | 0.449        | 1.18         | 0.341        | 1.24         | 0.828        | 1.06         | 0.046        | 0.45         | 0.801        | 1.11         | 0.732         | 0.88         | 0.784         | 0.90         |
| 375.13  | 8.1       | riboflavin                                        | 0.013        | 0.66         | 0.114        | 1.32         | 0.313        | 1.20         | 0.529        | 0.90         | 0.032        | 0.50         | 0.715        | 0.91         | 0.708         | 0.90         | 0.827         | 1.06         |
| 118.051 | 12.0      | Threonine                                         | 0.001        | 0.64         | 0.714        | 1.06         | 0.229        | 1.20         | 0.547        | 1.08         | 0.685        | 1.06         | 0.272        | 0.85         | 0.659         | 0.94         | 0.617         | 1.07         |
| 128.035 | 13.1      | Pyrrolinehydroxycarboxylate                       | 0.071        | 1.75         | 0.104        | 1.67         | 0.054        | 1.81         | 0.027        | 2.11         | 0.879        | 1.05         | 0.970        | 1.01         | 0.285         | 1.30         | 0.327         | 1.30         |
| 131.046 | 15.8      | Asparagine                                        | 0.003        | 0.76         | 0.000        | 0.65         | 0.009        | 0.76         | 0.158        | 0.86         | 0.928        | 0.99         | 0.512        | 0.93         | 0.397         | 0.90         | 0.496         | 0.91         |
| 132.102 | 11.3      | Leucine                                           | 0.030        | 0.59         | 0.533        | 0.84         | 0.267        | 0.74         | 0.039        | 0.55         | 0.061        | 0.67         | 0.361        | 0.83         | 0.303         | 0.81         | 0.485         | 0.88         |
| 148.043 | 14.0      | Methionine                                        | 0.002        | 0.58         | 0.917        | 1.02         | 0.617        | 0.92         | 0.404        | 0.85         | 0.011        | 0.61         | 0.005        | 0.66         | 0.015         | 0.66         | 0.010         | 0.68         |
| 176.038 | 10.4      | N-Formyl-L-methionine                             | 0.010        | 0.50         | 0.568        | 1.15         | 0.945        | 0.98         | 0.723        | 0.91         | 0.051        | 0.44         | 0.132        | 0.58         | 0.059         | 0.50         | 0.215         | 0.67         |
| 206.082 | 5.5       | N-Acetylphenylalanine                             | 0.096        | 1.36         | 0.070        | 1.42         | 0.006        | 1.81         | 0.007        | 1.74         | 0.716        | 0.93         | 0.954        | 0.99         | 0.909         | 0.98         | 0.753         | 1.07         |
| 267.047 | 11.7      | Homocystine                                       | 0.031        | 1.66         | 0.004        | 2.25         | 0.003        | 2.37         | 0.002        | 2.50         | na           | na           | na           | na           | na            | na           | na            | na           |
| 173.057 | 12.2      | N-Formiminoglutamate                              | 0.092        | 0.78         | 0.141        | 0.79         | 0.343        | 0.83         | 0.710        | 0.94         | 0.003        | 0.51         | 0.842        | 1.05         | 0.180         | 0.77         | 0.474         | 0.89         |
| 175.108 | 9.3       | N-Acetylorithine                                  | 0.005        | 0.70         | 0.893        | 0.98         | 0.958        | 0.99         | 0.977        | 1.00         | 0.000        | 0.57         | 0.431        | 0.90         | 0.737         | 0.96         | 0.020         | 0.76         |
| 187.072 | 11.4      | N-Acetylglutamine                                 | 0.001        | 0.67         | 0.112        | 0.80         | 0.307        | 0.88         | 0.293        | 0.89         | 0.001        | 0.63         | 0.609        | 0.93         | 0.410         | 0.88         | 0.088         | 0.80         |
| 188.103 | 14.8      | 5-guanidino-3-methyl-2-<br>oxo-pentanoate         | 0.438        | 1.14         | 0.094        | 1.31         | 0.431        | 1.10         | 0.001        | 1.85         | 0.002        | 0.48         | 0.362        | 0.81         | 0.048         | 0.69         | 0.045         | 0.69         |
| 188.104 | 15.9      | Homocitrulline                                    | 0.028        | 0.80         | 0.410        | 0.89         | 0.401        | 0.90         | 0.113        | 1.17         | 0.066        | 0.73         | 0.708        | 1.07         | 0.956         | 0.99         | 0.543         | 0.90         |
| 209.092 | 11.3      | Kynurenine                                        | 0.208        | 0.50         | 0.813        | 0.90         | 0.545        | 1.39         | 0.664        | 1.21         | 0.017        | 0.73         | 0.126        | 0.78         | 0.086         | 0.76         | 0.170         | 0.82         |
| 216.099 | 11.8      | N-Acetyl-citrulline                               | 0.001        | 0.60         | 0.925        | 1.01         | 0.999        | 1.00         | 0.596        | 1.09         | 0.005        | 0.55         | 0.928        | 0.98         | 0.851         | 0.96         | 0.746         | 0.93         |
| 221.092 | 6.8       | 5-Hydroxy-L-<br>tryptophan isomer                 | 0.058        | 2.25         | 0.111        | 1.90         | 0.476        | 0.77         | 0.374        | 1.42         | 0.530        | 0.95         | 0.973        | 1.00         | 0.209         | 0.87         | 0.383         | 0.91         |

Table S1. Cont.

| m/z     | Rt<br>min | Metabolite                       | p-Value      |              | Ratio        |              | P value      |              | Ratio        |              | P value      |              | Ratio        |              | P value       |              | Ratio         |              | P value |  | Ratio |  |
|---------|-----------|----------------------------------|--------------|--------------|--------------|--------------|--------------|--------------|--------------|--------------|--------------|--------------|--------------|--------------|---------------|--------------|---------------|--------------|---------|--|-------|--|
|         |           |                                  | D2S3<br>D2S1 | D2S3<br>D2S1 | D2S3<br>D2S2 | D2S3<br>D2S2 | D2S3<br>D2S4 | D2S3<br>D2S4 | D2S3<br>D2S5 | D2S3<br>D2S5 | D1S3<br>D1S1 | D1S3<br>D1S1 | D1S3<br>D1S2 | D1S3<br>D1S2 | D1 S3<br>D1S4 | D1S3<br>D1S4 | D1 S3<br>D1S5 | D1S3<br>D1S5 |         |  |       |  |
| 221.092 | 10.7      | 5-Hydroxy-L-tryptophan           | 0.017        | 0.59         | 0.684        | 1.11         | 0.816        | 0.95         | 0.733        | 0.92         | 0.001        | 0.52         | 0.198        | 0.81         | 0.167         | 0.81         | 0.249         | 0.85         |         |  |       |  |
| 247.14  | 15.0      | N2-(D-1-Carboxyethyl)-L-arginine | <0.001       | 2.23         | 0.000        | 2.06         | 0.000        | 1.82         | 0.000        | 3.19         | 0.323        | 0.82         | 0.476        | 0.82         | 0.235         | 0.76         | 0.300         | 0.78         |         |  |       |  |
| 245.093 | 13.0      | N-Acetyl-D-tryptophan            | 0.007        | 0.68         | 0.482        | 0.93         | 0.695        | 1.03         | 0.581        | 0.94         | 0.420        | 0.84         | 0.919        | 1.02         | 0.738         | 1.08         | 0.514         | 1.16         |         |  |       |  |
| 247.073 | 9.5       | 5-Hydroxyindoleacetyl glycine    | 0.109        | 0.53         | 0.495        | 1.42         | 0.589        | 0.80         | 0.551        | 0.77         | 0.474        | 0.82         | 0.619        | 1.15         | 0.984         | 1.01         | 0.366         | 1.30         |         |  |       |  |
| 253.051 | 11.1      | 5-L-Glutamyl-taurine             | 0.001        | 0.43         | 0.512        | 1.23         | 0.918        | 1.03         | 0.626        | 0.86         | 0.056        | 0.78         | 0.642        | 0.93         | 0.548         | 0.91         | 0.275         | 0.85         |         |  |       |  |
| 153.02  | 14.0      | 2,5-Dihydroxybenzoate            | 0.078        | 1.32         | 0.111        | 1.32         | 0.034        | 1.58         | 0.016        | 1.58         | 0.884        | 0.96         | 0.705        | 1.10         | 0.271         | 1.30         | 0.193         | 1.41         |         |  |       |  |
| 192.067 | 6.0       | Phenylacetyl glycine             | 0.004        | 1.76         | 0.210        | 1.29         | 0.014        | 1.75         | 0.001        | 2.11         | 0.277        | 0.76         | 0.364        | 0.82         | 0.424         | 0.83         | 0.520         | 0.83         |         |  |       |  |
| 197.046 | 9.8       | 3-(3,4-Dihydroxyphenyl)lactate   | 0.025        | 1.43         | 0.001        | 1.92         | 0.004        | 1.74         | 0.003        | 1.76         | 0.383        | 0.85         | 0.895        | 1.03         | 0.753         | 1.06         | 0.666         | 1.08         |         |  |       |  |
| 367.104 | 6.7       | O-Feruloylquininate              | 0.054        | 1.74         | 0.366        | 1.30         | 0.416        | 1.25         | 0.524        | 0.81         | 0.018        | 2.41         | 0.816        | 0.92         | 0.199         | 0.70         | 0.423         | 1.24         |         |  |       |  |
| 119.035 | 13.4      | D-Erythrose                      | 0.001        | 0.67         | 0.967        | 1.00         | 0.792        | 0.98         | 0.558        | 1.07         | 0.334        | 0.87         | 0.010        | 0.66         | 0.329         | 0.87         | 0.105         | 0.76         |         |  |       |  |
| 119.035 | 10.9      | D-Erythrose                      | 0.027        | 0.73         | 0.924        | 1.02         | 0.259        | 1.25         | 0.423        | 1.16         | 0.032        | 0.63         | 0.017        | 0.59         | 0.069         | 0.68         | 0.021         | 0.61         |         |  |       |  |
| 149.046 | 11.1      | D-Ribose                         | 0.003        | 0.70         | 0.024        | 1.33         | 0.254        | 1.13         | 0.121        | 1.21         | 0.282        | 1.13         | 0.764        | 1.02         | 0.186         | 1.15         | 0.924         | 0.99         |         |  |       |  |
| 151.061 | 13.6      | Xylitol                          | 0.016        | 0.73         | 0.238        | 1.21         | 0.397        | 1.14         | 0.442        | 1.13         | 0.036        | 0.62         | 0.012        | 0.57         | 0.035         | 0.63         | 0.031         | 0.64         |         |  |       |  |
| 163.061 | 9.9       | L-Rhamnose                       | 0.025        | 0.67         | 0.568        | 1.11         | 0.810        | 0.97         | 0.445        | 0.90         | 0.125        | 0.72         | 0.039        | 0.65         | 0.022         | 0.59         | 0.026         | 0.61         |         |  |       |  |
| 165.04  | 8.9       | L-Arabinonate                    | 0.023        | 0.65         | 0.185        | 1.37         | 0.052        | 1.74         | 0.923        | 0.98         | 0.072        | 0.60         | 0.160        | 0.70         | 0.029         | 0.55         | 0.483         | 0.82         |         |  |       |  |
| 181.072 | 14.7      | D-Sorbitol                       | 0.050        | 0.70         | 0.598        | 1.08         | 0.800        | 1.04         | 0.172        | 1.26         | 0.126        | 0.65         | 0.070        | 0.60         | 0.047         | 0.55         | 0.144         | 0.67         |         |  |       |  |
| 193.036 | 15.2      | D-Glucuronate                    | 0.018        | 0.63         | 0.914        | 0.99         | 0.903        | 0.99         | 0.391        | 1.10         | 0.244        | 0.85         | 0.085        | 0.79         | 0.165         | 0.80         | 0.924         | 0.98         |         |  |       |  |
| 341.109 | 13.7      | Sucrose                          | 0.028        | 0.61         | 0.640        | 1.11         | 0.228        | 0.78         | 0.036        | 1.79         | 0.090        | 0.70         | 0.300        | 0.85         | 0.189         | 0.81         | 0.970         | 1.01         |         |  |       |  |
| 173.082 | 13.2      | Suberic acid                     | 0.039        | 0.52         | 0.598        | 0.80         | 0.944        | 0.98         | 0.386        | 0.78         | 0.001        | 0.47         | 0.353        | 0.83         | 0.889         | 1.04         | 0.311         | 1.34         |         |  |       |  |
| 199.097 | 11.1      | Decenedioic acid                 | 0.007        | 0.49         | 0.497        | 1.13         | 0.669        | 0.92         | 0.034        | 0.64         | 0.412        | 0.96         | 0.110        | 1.09         | 0.805         | 0.99         | 0.169         | 1.08         |         |  |       |  |
| 217.108 | 13.0      | Hydroxysebacic acid              | 0.066        | 0.53         | 0.498        | 0.82         | 0.715        | 0.88         | 0.649        | 0.88         | 0.120        | 0.53         | 0.228        | 0.68         | 0.983         | 1.01         | 0.203         | 0.64         |         |  |       |  |

**Table S2.** Metabolites with the highest correlation to the OPLSDA model for D2S3 vs D2S1. Metabolites with positive p (corr) values associate with D2S1 and metabolites with negative p(corr) values associate with D2S3.

| m/z     | Rt   | Molecular Formula                                                | Metabolite              | p-Value D2S3/D2S1 | Ratio D2S3/D2S1 | p(corr) |
|---------|------|------------------------------------------------------------------|-------------------------|-------------------|-----------------|---------|
| 409.183 | 14.7 | C <sub>22</sub> H <sub>28</sub> F <sub>2</sub> O <sub>5</sub>    | Flumethasone            | 0.00001           | 0.24            | 0.89    |
| 583.312 | 10.3 | C <sub>30</sub> H <sub>48</sub> O <sub>11</sub>                  | Cholic acid glucuronide | 0.00009           | 0.27            | 0.63    |
| 407.164 | 15.2 | C <sub>22</sub> H <sub>29</sub> O <sub>5</sub> Cl                | Beclomethasone          | 0.00012           | 0.20            | 0.68    |
| 331.09  | 10.9 | C <sub>13</sub> H <sub>21</sub> N <sub>2</sub> O <sub>4</sub> PS | Butamifos               | 0.00015           | 0.48            | 0.78    |
| 173.092 | 13.3 | C <sub>7</sub> H <sub>12</sub> N <sub>2</sub> O <sub>3</sub>     | Glycylproline           | 0.00015           | 0.54            | 0.75    |
| 477.147 | 12.8 | C <sub>17</sub> H <sub>26</sub> N <sub>4</sub> O <sub>12</sub>   | Glu-Thr-Asp-Asp         | 0.00026           | 0.42            | 0.72    |
| 291.15  | 10.2 | C <sub>19</sub> H <sub>20</sub> N <sub>2</sub> O                 | 16-Epivelloimine        | 0.00029           | 0.33            | 0.61    |
| 461.225 | 9.8  | C <sub>19</sub> H <sub>34</sub> N <sub>4</sub> O <sub>9</sub>    | Glu-Leu-Thr-Thr         | 0.00035           | 0.24            | 0.67    |
| 233.068 | 11.9 | C <sub>9</sub> H <sub>14</sub> O <sub>7</sub>                    | trihomocitrate          | 0.00038           | 0.50            | 0.71    |

Table S2. Cont.

| m/z     | Rt   | Molecular Formula                                                            | Metabolite                                                                                                  | p-Value D2S3/D2S1 | Ratio D2S3/D2S1 | p(corr) |
|---------|------|------------------------------------------------------------------------------|-------------------------------------------------------------------------------------------------------------|-------------------|-----------------|---------|
| 471.218 | 9.1  | C <sub>30</sub> H <sub>32</sub> O <sub>5</sub>                               | [Fv] Euchrenone a14                                                                                         | 0.00049           | 0.26            | 0.81    |
| 173.073 | 12.4 | C <sub>10</sub> H <sub>10</sub> N <sub>2</sub> O                             | Indole-3-acetamide                                                                                          | 0.00058           | 0.61            | 0.70    |
| 375.152 | 4.0  | C <sub>26</sub> H <sub>20</sub> N <sub>2</sub> O                             | XE991                                                                                                       | 0.00073           | 0.10            | 0.65    |
| 407.281 | 6.6  | C <sub>24</sub> H <sub>40</sub> O <sub>5</sub>                               | [ST trihydrox] 3Alpha,7Alpha,12Alpha-trihydroxy-5Beta-cholan-24-oic acid                                    | 0.00079           | 0.34            | 0.74    |
| 118.051 | 12.0 | C <sub>4</sub> H <sub>9</sub> NO <sub>3</sub>                                | L-Threonine                                                                                                 | 0.00079           | 0.64            | 0.71    |
| 281.114 | 11.9 | C <sub>13</sub> H <sub>18</sub> N <sub>2</sub> O <sub>5</sub>                | Thr-Tyr                                                                                                     | 0.00082           | 0.39            | 0.68    |
| 322.09  | 11.2 | C <sub>11</sub> H <sub>21</sub> N <sub>3</sub> O <sub>4</sub> S <sub>2</sub> | Met-Ala-Cys                                                                                                 | 0.00106           | 0.27            | 0.65    |
| 291.114 | 9.7  | C <sub>18</sub> H <sub>16</sub> N <sub>2</sub> O <sub>2</sub>                | INF271                                                                                                      | 0.00109           | 0.55            | 0.64    |
| 220.029 | 11.1 | C <sub>7</sub> H <sub>11</sub> NO <sub>5</sub> S                             | S-(3-oxo-3-carboxy-n-propyl)cysteine                                                                        | 0.00111           | 0.21            | 0.63    |
| 288.124 | 12.1 | C <sub>16</sub> H <sub>19</sub> NO <sub>4</sub>                              | 3'-Demethoxyplartine                                                                                        | 0.00117           | 0.26            | 0.71    |
| 377.146 | 13.2 | C <sub>17</sub> H <sub>22</sub> N <sub>4</sub> O <sub>6</sub>                | Trp-Ser-Ser                                                                                                 | 0.00122           | 0.29            | 0.71    |
| 302.136 | 12.6 | C <sub>12</sub> H <sub>21</sub> N <sub>3</sub> O <sub>6</sub>                | Nicotianamine                                                                                               | 0.00122           | 0.47            | 0.67    |
| 413.219 | 4.9  | C <sub>21</sub> H <sub>34</sub> O <sub>8</sub>                               | [FA methyl(20:2)] methyl 5-hydroperoxy-6,8,9,11-bisepidioxy-12,14-eicosadienoate                            | 0.00126           | 0.59            | 0.64    |
| 216.099 | 11.8 | C <sub>8</sub> H <sub>15</sub> N <sub>3</sub> O <sub>4</sub>                 | N-Acetyl-L-citrulline                                                                                       | 0.00132           | 0.60            | 0.63    |
| 334.055 | 10.8 | C <sub>9</sub> H <sub>14</sub> N <sub>5</sub> O <sub>7</sub> P               | Dihydroneopterin phosphate                                                                                  | 0.00146           | 0.39            | 0.64    |
| 172.097 | 10.9 | C <sub>8</sub> H <sub>13</sub> NO <sub>3</sub>                               | N-Butyryl-L-homoserine lactone                                                                              | 0.00147           | 0.60            | 0.67    |
| 389.179 | 8.3  | C <sub>25</sub> H <sub>27</sub> N <sub>2</sub> Cl                            | Meclizine                                                                                                   | 0.00161           | 0.50            | 0.67    |
| 148.043 | 14.0 | C <sub>5</sub> H <sub>11</sub> NO <sub>2</sub> S                             | L-Methionine                                                                                                | 0.00165           | 0.58            | 0.63    |
| 399.124 | 12.9 | C <sub>25</sub> H <sub>20</sub> O <sub>5</sub>                               | [Fv methoxy, methox] (S)-2,3-Dihydro-7-methoxy-2-[2-(4-methoxyphenyl)-5-benzofuranyl]-4H-1-benzopyran-4-one | 0.00166           | 0.45            | 0.63    |
| 215.104 | 9.3  | C <sub>9</sub> H <sub>16</sub> N <sub>2</sub> O <sub>4</sub>                 | gamma-Glutamyl-gamma-aminobutyraldehyde                                                                     | 0.00180           | 0.64            | 0.68    |
| 247.129 | 13.4 | C <sub>10</sub> H <sub>18</sub> N <sub>2</sub> O <sub>5</sub>                | Glu-Val                                                                                                     | 0.00187           | 0.40            | 0.62    |
| 583.312 | 11.5 | C <sub>30</sub> H <sub>48</sub> O <sub>11</sub>                              | Cholicacidglucuronide                                                                                       | 0.00253           | 0.23            | 0.50    |
| 321.089 | 14.1 | C <sub>10</sub> H <sub>18</sub> N <sub>4</sub> O <sub>6</sub> S              | Asn-Cys-Ser                                                                                                 | 0.00282           | 0.39            | 0.59    |
| 421.171 | 12.0 | C <sub>19</sub> H <sub>26</sub> N <sub>4</sub> O <sub>7</sub>                | Ala-Phe-Ala-Asp                                                                                             | 0.00373           | 0.31            | 0.54    |
| 449.203 | 10.4 | C <sub>21</sub> H <sub>30</sub> N <sub>4</sub> O <sub>7</sub>                | Ala-Phe-Val-Asp                                                                                             | 0.00400           | 0.32            | 0.74    |
| 388.168 | 10.2 | C <sub>20</sub> H <sub>24</sub> FN <sub>3</sub> O <sub>4</sub>               | Balofloxacin                                                                                                | 0.00534           | 0.14            | 0.50    |
| 379.161 | 11.7 | C <sub>17</sub> H <sub>24</sub> N <sub>4</sub> O <sub>6</sub>                | Ala-Gln-Tyr                                                                                                 | 0.00542           | 0.35            | 0.63    |
| 191.103 | 9.8  | C <sub>7</sub> H <sub>14</sub> N <sub>2</sub> O <sub>4</sub>                 | meso-2,6-Diaminoheptanedioate                                                                               | 0.00647           | 0.30            | 0.57    |
| 214.028 | 9.7  | C <sub>9</sub> H <sub>10</sub> ClNO <sub>3</sub>                             | 3-Chlorotyrosine                                                                                            | 0.00697           | 0.23            | 0.59    |
| 142.051 | 9.6  | C <sub>6</sub> H <sub>9</sub> NO <sub>3</sub>                                | Vinylacetyl glycine                                                                                         | 0.00755           | 0.56            | 0.67    |
| 301.129 | 14.9 | C <sub>15</sub> H <sub>18</sub> N <sub>4</sub> O <sub>3</sub>                | Phe-His                                                                                                     | 0.00904           | 0.31            | 0.59    |
| 254.096 | 14.5 | C <sub>13</sub> H <sub>18</sub> ClNO <sub>2</sub>                            | Hydroxybupropion                                                                                            | 0.00917           | 0.49            | 0.63    |

Table S2. Cont.

| m/z     | Rt   | Molecular Formula                                               | Metabolite                                                            | p-Value D2S3/D2S1 | Ratio D2S3/D2S1 | p(corr) |
|---------|------|-----------------------------------------------------------------|-----------------------------------------------------------------------|-------------------|-----------------|---------|
| 261.144 | 5.6  | C <sub>11</sub> H <sub>20</sub> N <sub>2</sub> O <sub>5</sub>   | Glu-Leu                                                               | 0.01123           | 0.31            | 0.60    |
| 322.113 | 9.0  | C <sub>13</sub> H <sub>23</sub> NO <sub>4</sub> S <sub>2</sub>  | S-Glutaryldihydroliipoamide                                           | 0.01264           | 0.47            | 0.58    |
| 403.161 | 11.1 | C <sub>19</sub> H <sub>24</sub> N <sub>4</sub> O <sub>6</sub>   | Glu-Ala-Trp                                                           | 0.01338           | 0.26            | 0.65    |
| 258.108 | 15.7 | C <sub>10</sub> H <sub>17</sub> N <sub>3</sub> O <sub>5</sub>   | Gly-Pro-Ser                                                           | 0.02019           | 0.25            | 0.50    |
| 421.228 | 4.4  | C <sub>20</sub> H <sub>38</sub> O <sub>7</sub> S                | 1,4-Bis(2-ethylhexyl) sulfosuccinate                                  | 0.02783           | 0.33            | 0.51    |
| 218.139 | 6.0  | C <sub>10</sub> H <sub>19</sub> NO <sub>4</sub>                 | O-Propanoylcarnitine                                                  | 0.03150           | 0.36            | 0.45    |
| 147.066 | 11.1 | C <sub>6</sub> H <sub>12</sub> O <sub>4</sub>                   | [FA methyl,hydroxy(5:0)] 3R-methyl-3,5-dihydroxy-pentanoic acid       | 0.03859           | 0.61            | 0.55    |
| 297.181 | 4.6  | C <sub>13</sub> H <sub>22</sub> N <sub>5</sub> O <sub>3</sub>   | diphthamide                                                           | 0.04240           | 0.47            | 0.46    |
| 386.145 | 15.5 | C <sub>18</sub> H <sub>21</sub> N <sub>5</sub> O <sub>5</sub>   | benzyladenine-7-N-glucoside                                           | 0.04767           | 0.34            | 0.57    |
| 379.168 | 12.0 | C <sub>22</sub> H <sub>24</sub> N <sub>2</sub> O <sub>4</sub>   | Vomicine                                                              | 0.05349           | 0.34            | 0.58    |
| 469.16  | 4.5  | C <sub>19</sub> H <sub>26</sub> N <sub>4</sub> O <sub>10</sub>  | Asp-Ser-Ser-Tyr                                                       | 0.09988           | 0.29            | 0.47    |
| 434.214 | 7.9  | C <sub>19</sub> H <sub>29</sub> N <sub>7</sub> O <sub>5</sub>   | Phe-Asn-Arg                                                           | 0.14187           | 0.38            | 0.51    |
| 247.14  | 15.0 | C <sub>9</sub> H <sub>18</sub> N <sub>4</sub> O <sub>4</sub>    | N2-(D-1-Carboxyethyl)-L-arginine                                      | 0.00001           | 2.23            | -0.89   |
| 178.072 | 10.8 | C <sub>7</sub> H <sub>7</sub> N <sub>5</sub> O                  | 6-methyl-H2-pterin                                                    | 0.00007           | 3.94            | -0.90   |
| 182.997 | 17.0 | C <sub>4</sub> H <sub>8</sub> SO <sub>6</sub>                   | hydroxybutyric acid sulfate                                           | 0.00008           | 2.17            | -0.85   |
| 250.105 | 10.8 | C <sub>8</sub> H <sub>15</sub> N <sub>3</sub> O <sub>6</sub>    | Gly-Ser-Ser                                                           | 0.00010           | 3.43            | -0.87   |
| 137.046 | 10.8 | C <sub>5</sub> H <sub>4</sub> N <sub>4</sub> O                  | Hypoxanthine                                                          | 0.00011           | 3.75            | -0.89   |
| 190.072 | 9.6  | C <sub>7</sub> H <sub>13</sub> NO <sub>5</sub>                  | 2-amino-3,7-dideoxy-D-threo-hept-6-ulosonate                          | 0.00073           | 1.42            | -0.77   |
| 217.083 | 10.9 | C <sub>8</sub> H <sub>14</sub> N <sub>2</sub> O <sub>5</sub>    | L-Ala-L-Glu                                                           | 0.00096           | 1.76            | -0.73   |
| 240.102 | 9.1  | C <sub>15</sub> H <sub>13</sub> NO <sub>2</sub>                 | N-Hydroxy-2-acetamidofluorene                                         | 0.00169           | 3.88            | -0.66   |
| 140.082 | 8.9  | C <sub>6</sub> H <sub>9</sub> N <sub>3</sub> O                  | L-Histidinal                                                          | 0.00201           | 4.27            | -0.67   |
| 240.001 | 15.7 | C <sub>6</sub> H <sub>11</sub> NO <sub>5</sub> S <sub>2</sub>   | 3-Mercaptolactate-cysteinedisulfide                                   | 0.00246           | 1.53            | -0.68   |
| 202.109 | 5.8  | C <sub>9</sub> H <sub>18</sub> NO <sub>4</sub>                  | O-Acetylcarnitine                                                     | 0.00260           | 1.76            | -0.69   |
| 192.067 | 6.0  | C <sub>10</sub> H <sub>11</sub> NO <sub>3</sub>                 | Phenylacetyl glycine                                                  | 0.00432           | 1.76            | -0.63   |
| 172.097 | 13.5 | C <sub>8</sub> H <sub>13</sub> NO <sub>3</sub>                  | N-Butyryl-L-homoserine lactone                                        | 0.00546           | 3.77            | -0.58   |
| 555.245 | 8.8  | C <sub>28</sub> H <sub>36</sub> N <sub>4</sub> O <sub>8</sub>   | Asp-Leu-Phe-Tyr                                                       | 0.00753           | 1.48            | -0.70   |
| 253.093 | 9.2  | C <sub>10</sub> H <sub>12</sub> N <sub>4</sub> O <sub>4</sub>   | Deoxyinosine                                                          | 0.00884           | 4.97            | -0.76   |
| 314.234 | 5.6  | C <sub>17</sub> H <sub>33</sub> NO <sub>4</sub>                 | [FA (10:0)] O-decanoyl-R-carnitine                                    | 0.00975           | 1.56            | -0.65   |
| 285.083 | 13.1 | C <sub>10</sub> H <sub>12</sub> N <sub>4</sub> O <sub>6</sub>   | Xanthosine                                                            | 0.01137           | 2.33            | -0.61   |
| 391.019 | 17.0 | C <sub>18</sub> H <sub>17</sub> O <sub>5</sub> Br               | [Fv hydroxy,trimethox] 3'-Bromo-6'-hydroxy-2',4,4'-trimethoxychalcone | 0.01425           | 1.79            | -0.57   |
| 231.009 | 4.1  | C <sub>3</sub> H <sub>11</sub> N <sub>3</sub> O <sub>5</sub> PS | N-Phosphohypotaurocyamine                                             | 0.01992           | 1.59            | -0.64   |
| 168.066 | 8.0  | C <sub>8</sub> H <sub>9</sub> NO <sub>3</sub>                   | Pyridoxal                                                             | 0.02063           | 5.50            | -0.54   |
| 541.265 | 9.6  | C <sub>24</sub> H <sub>34</sub> N <sub>10</sub> O <sub>5</sub>  | His-Leu-His-His                                                       | 0.02189           | 1.84            | -0.63   |

Table S2. Cont.

| m/z     | Rt   | Molecular Formula                                                            | Metabolite                                            | p-Value D2S3/D2S1 | Ratio D2S3/D2S1 | p(corr) |
|---------|------|------------------------------------------------------------------------------|-------------------------------------------------------|-------------------|-----------------|---------|
| 269.088 | 11.5 | C <sub>9</sub> H <sub>16</sub> O <sub>9</sub>                                | inosine                                               | 0.02489           | 16.27           | -0.55   |
| 197.046 | 9.8  | C <sub>9</sub> H <sub>10</sub> O <sub>5</sub>                                | 3-(3,4-Dihydroxyphenyl)lactate                        | 0.02514           | 1.43            | -0.63   |
| 498.27  | 6.1  | C <sub>26</sub> H <sub>35</sub> N <sub>5</sub> O <sub>5</sub>                | Lys-Phe-Phe-Gly                                       | 0.03237           | 1.75            | -0.61   |
| 132.066 | 14.2 | C <sub>5</sub> H <sub>9</sub> NO <sub>3</sub>                                | hydroxyproline                                        | 0.03886           | 18.28           | -0.46   |
| 161.038 | 19.7 | C <sub>7</sub> H <sub>11</sub> O <sub>2</sub> Cl                             | [FA (7:0)] 7-chloro-2E-heptenoic acid                 | 0.04844           | 1.90            | -0.51   |
| 221.092 | 6.8  | C <sub>11</sub> H <sub>12</sub> N <sub>2</sub> O <sub>3</sub>                | 5-Hydroxy-L-tryptophan                                | 0.05752           | 2.25            | -0.46   |
| 450.136 | 4.5  | C <sub>20</sub> H <sub>25</sub> N <sub>3</sub> O <sub>7</sub> S              | (1R)-Hydroxy-(2R)-glutathionyl-1,2-dihydronaphthalene | 0.05860           | 1.98            | -0.56   |
| 198.113 | 16.8 | C <sub>10</sub> H <sub>15</sub> NO <sub>3</sub>                              | L-Metanephrine                                        | 0.08210           | 3.00            | -0.39   |
| 395.071 | 11.3 | C <sub>12</sub> H <sub>20</sub> N <sub>4</sub> O <sub>7</sub> S <sub>2</sub> | Asp-Cys-Cys-Gly                                       | 0.09705           | 2.66            | -0.62   |
| 420.223 | 4.5  | C <sub>20</sub> H <sub>29</sub> N <sub>5</sub> O <sub>5</sub>                | Lys-Trp-Ser                                           | 0.11143           | 2.04            | -0.58   |
| 173.092 | 14.9 | C <sub>7</sub> H <sub>12</sub> N <sub>2</sub> O <sub>3</sub>                 | Glycylproline                                         | 0.11562           | 5.58            | -0.38   |
| 170.081 | 12.4 | C <sub>8</sub> H <sub>11</sub> NO <sub>3</sub>                               | Pyridoxine                                            | 0.19003           | 2.05            | -0.32   |

**Table S3.** Metabolites with the highest correlation to the OPLSDA model for D1S3 vs D1S1. Metabolites with positive p (corr) values associate with D1S1 and metabolites with negative p(corr) values associate with D1S3.

| m/z     | Rt   | Molecular Formula                                               | Metabolite                                                                           | p-Value | Ratio D1S3/D1S1 | p(corr) |
|---------|------|-----------------------------------------------------------------|--------------------------------------------------------------------------------------|---------|-----------------|---------|
| 334.126 | 18.0 | C <sub>12</sub> H <sub>21</sub> N <sub>3</sub> O <sub>8</sub>   | N4-(Acetyl-beta-D-glucosaminyl)asparagine                                            | 0.00098 | 19.59           | 0.79    |
| 277.002 | 11.5 | C <sub>9</sub> H <sub>10</sub> SO <sub>8</sub>                  | trihydroxyphenylpropionic acid sulfate or isomer                                     | 0.02027 | 22.15           | 0.84    |
| 330.118 | 10.8 | C <sub>14</sub> H <sub>19</sub> NO <sub>8</sub>                 | Dopamineglucuronide                                                                  | 0.02707 | 4.62            | 0.50    |
| 379.122 | 5.4  | C <sub>19</sub> H <sub>24</sub> O <sub>6</sub> S                | [ST methoxy,hydroxy(3:0)] 2-methoxy-3-hydroxy-estra-1,3,5(10)-trien-17-one 3-sulfate | 0.01368 | 6.81            | 0.73    |
| 409.136 | 8.7  | C <sub>17</sub> H <sub>22</sub> N <sub>4</sub> O <sub>8</sub>   | Asn-Asp-Tyr                                                                          | 0.05651 | 5.74            | 0.58    |
| 319.045 | 4.2  | C <sub>15</sub> H <sub>12</sub> O <sub>8</sub>                  | Dihydromyricetin                                                                     | 0.04583 | 2.89            | 0.67    |
| 367.066 | 15.7 | C <sub>10</sub> H <sub>15</sub> N <sub>4</sub> O <sub>9</sub> P | 1-(5'-Phosphoribosyl)-5-formamido-4-imidazolecarboxamide                             | 0.00296 | 6.45            | 0.74    |
| 240.101 | 10.8 | C <sub>15</sub> H <sub>13</sub> NO <sub>2</sub>                 | N-Hydroxy-2-acetamidofluorene                                                        | 0.00378 | 3.09            | 0.57    |
| 346.056 | 11.2 | C <sub>10</sub> H <sub>14</sub> N <sub>5</sub> O <sub>7</sub> P | AMP                                                                                  | 0.06766 | 6.58            | 0.56    |
| 490.216 | 5.1  | C <sub>19</sub> H <sub>33</sub> N <sub>5</sub> O <sub>10</sub>  | Glu-Lys-Thr-Asp                                                                      | 0.05040 | 3.00            | 0.51    |
| 234.077 | 9.5  | C <sub>12</sub> H <sub>11</sub> NO <sub>4</sub>                 | 2-Hydroxy-6-oxo-(2'-aminophenyl)-hexa-2,4-dienoate                                   | 0.00034 | 4.54            | 0.80    |
| 597.366 | 5.0  | C <sub>33</sub> H <sub>48</sub> N <sub>4</sub> O <sub>6</sub>   | L-Urobilinogen                                                                       | 0.00696 | 6.71            | 0.69    |
| 343.118 | 7.9  | C <sub>19</sub> H <sub>18</sub> O <sub>6</sub>                  | [Fv Methyl,trimethox] 3,4-Methylenedioxy-2',4',6'-trimethoxychalcone                 | 0.01677 | 5.06            | 0.63    |
| 367.104 | 6.4  | C <sub>17</sub> H <sub>20</sub> O <sub>9</sub>                  | O-Feruloylquininate                                                                  | 0.01823 | 2.41            | 0.70    |
| 188.003 | 5.1  | C <sub>6</sub> H <sub>7</sub> NO <sub>4</sub> S                 | 2-Pyridyl hydroxymethane sulfonic acid                                               | 0.00313 | 2.56            | 0.73    |
| 200.175 | 12.1 | C <sub>10</sub> H <sub>21</sub> N <sub>3</sub> O                | Diethylcarbamazine                                                                   | 0.01824 | 4.84            | 0.62    |
| 381.18  | 14.2 | C <sub>22</sub> H <sub>24</sub> N <sub>2</sub> O <sub>4</sub>   | Vomicine                                                                             | 0.00890 | 2.89            | 0.60    |

Table S3. Cont.

| m/z     | Rt   | Molecular Formula                                               | Metabolite                                                     | p-Value | Ratio D1S3/D1S1 | p(corr) |
|---------|------|-----------------------------------------------------------------|----------------------------------------------------------------|---------|-----------------|---------|
| 240.109 | 10.8 | C <sub>9</sub> H <sub>13</sub> N <sub>5</sub> O <sub>3</sub>    | Dihydrobiopterin                                               | 0.00080 | 2.72            | 0.76    |
| 359.204 | 24.0 | C <sub>14</sub> H <sub>26</sub> N <sub>6</sub> O <sub>5</sub>   | Pro-Ser-Arg                                                    | 0.00625 | 4.80            | 0.67    |
| 302.134 | 16.5 | C <sub>12</sub> H <sub>19</sub> N <sub>3</sub> O <sub>6</sub>   | Ala-Asp-Pro                                                    | 0.00152 | 4.57            | 0.80    |
| 277.003 | 14.4 | C <sub>9</sub> H <sub>10</sub> SO <sub>8</sub>                  | trihydroxyphenylpropionic acid sulfate or isomer               | 0.06894 | 3.20            | 0.51    |
| 385.144 | 6.4  | C <sub>13</sub> H <sub>24</sub> N <sub>2</sub> O <sub>11</sub>  | Macrozamin                                                     | 0.00710 | 4.28            | 0.72    |
| 298.093 | 8.9  | C <sub>13</sub> H <sub>17</sub> NO <sub>7</sub>                 | p-aminobenzoate-&beta;-D-glucopyranosyl ester                  | 0.01663 | 2.27            | 0.57    |
| 218.049 | 4.5  | C <sub>8</sub> H <sub>11</sub> NO <sub>4</sub> S                | Tyramine-O-sulfate                                             | 0.02041 | 2.32            | 0.66    |
| 295.087 | 7.8  | C <sub>12</sub> H <sub>16</sub> N <sub>4</sub> O <sub>5</sub> S | 5'-methylthiotubercidin                                        | 0.02420 | 3.72            | 0.39    |
| 302.087 | 13.7 | C <sub>12</sub> H <sub>15</sub> NO <sub>8</sub>                 | 4-Nitrophenol-alpha-D-galactopyranoside                        | 0.00129 | 2.55            | 0.70    |
| 261.091 | 4.3  | C <sub>10</sub> H <sub>16</sub> N <sub>2</sub> O <sub>4</sub> S | d-biotin d-sulfoxide                                           | 0.03123 | 1.94            | 0.63    |
| 176.001 | 5.6  | C <sub>5</sub> H <sub>5</sub> NSO <sub>4</sub>                  | hydroxypyridine sulfate                                        | 0.07406 | 2.56            | 0.46    |
| 381.137 | 5.3  | C <sub>22</sub> H <sub>23</sub> ClN <sub>2</sub> O <sub>2</sub> | Loratadine                                                     | 0.00094 | 2.69            | 0.73    |
| 595.35  | 5.1  | C <sub>33</sub> H <sub>46</sub> N <sub>4</sub> O <sub>6</sub>   | L-Urobilin                                                     | 0.00315 | 2.99            | 0.59    |
| 275.092 | 10.9 | C <sub>15</sub> H <sub>16</sub> O <sub>5</sub>                  | Lactucin                                                       | 0.04030 | 1.91            | 0.54    |
| 315.159 | 12.9 | C <sub>19</sub> H <sub>22</sub> O <sub>4</sub>                  | [PR] 2,3-Didehydrogibberellin A10                              | 0.00014 | 2.12            | 0.74    |
| 234.077 | 12.7 | C <sub>12</sub> H <sub>11</sub> NO <sub>4</sub>                 | 2-Hydroxy-6-oxo-(2'-aminophenyl)-hexa-2,4-dienoate             | 0.00010 | 2.98            | 0.81    |
| 270.061 | 11.7 | C <sub>11</sub> H <sub>13</sub> NO <sub>7</sub>                 | hydroxypyridine glucuronide                                    | 0.09258 | 2.11            | 0.57    |
| 163.052 | 8.8  | C <sub>7</sub> H <sub>11</sub> O <sub>2</sub> Cl                | [FA (7:0)] 7-chloro-2E-heptenoic acid                          | 0.09062 | 2.00            | 0.51    |
| 446.152 | 16.4 | C <sub>16</sub> H <sub>25</sub> N <sub>5</sub> O <sub>10</sub>  | Ala-Asp-Asp-Gln                                                | 0.04092 | 3.77            | 0.53    |
| 156.077 | 17.2 | C <sub>6</sub> H <sub>9</sub> N <sub>3</sub> O <sub>2</sub>     | L-Histidine                                                    | 0.00012 | 3.54            | 0.85    |
| 161.128 | 23.0 | C <sub>7</sub> H <sub>16</sub> N <sub>2</sub> O <sub>2</sub>    | N6-Methyl-L-lysine                                             | 0.00168 | 2.67            | 0.73    |
| 593.334 | 5.3  | C <sub>32</sub> H <sub>48</sub> O <sub>10</sub>                 | Debromoaplysiatoxin                                            | 0.01163 | 2.41            | 0.53    |
| 173.987 | 5.6  | C <sub>5</sub> H <sub>5</sub> NSO <sub>4</sub>                  | hydroxypyridine sulfate                                        | 0.03154 | 2.07            | 0.65    |
| 594.337 | 5.2  | C <sub>26</sub> H <sub>43</sub> N <sub>9</sub> O <sub>7</sub>   | Arg-Lys-Gln-Tyr                                                | 0.01468 | 2.29            | 0.50    |
| 411.122 | 6.0  | C <sub>20</sub> H <sub>25</sub> O <sub>7</sub> Cl               | Eupachlorin                                                    | 0.01506 | 4.31            | 0.62    |
| 156.077 | 15.8 | C <sub>6</sub> H <sub>9</sub> N <sub>3</sub> O <sub>2</sub>     | L-Histidine                                                    | 0.00002 | 2.63            | 0.87    |
| 327.072 | 13.9 | C <sub>14</sub> H <sub>16</sub> O <sub>9</sub>                  | 2-Succinyl-5-enolpyruvyl-6-hydroxy-3-cyclohexene-1-carboxylate | 0.04770 | 2.09            | 0.46    |
| 221.081 | 6.0  | C <sub>12</sub> H <sub>12</sub> O <sub>4</sub>                  | 2,6-Dioxo-6-phenylhexanoate                                    | 0.04714 | 1.97            | 0.56    |
| 273.008 | 5.2  | C <sub>10</sub> H <sub>10</sub> SO <sub>7</sub>                 | ferulic acid sulfate or isomer                                 | 0.21485 | 1.87            | 0.49    |
| 154.062 | 15.7 | C <sub>6</sub> H <sub>9</sub> N <sub>3</sub> O <sub>2</sub>     | L-Histidine                                                    | 0.00166 | 2.73            | 0.72    |
| 196.026 | 13.5 | C <sub>8</sub> H <sub>7</sub> NO <sub>5</sub>                   | 3-Hydroxy-2-methylpyridine-4,5-dicarboxylate                   | 0.05050 | 2.03            | 0.49    |
| 399.144 | 16.6 | C <sub>22</sub> H <sub>22</sub> O <sub>7</sub>                  | Deoxy podophyllotoxin                                          | 0.00169 | 3.17            | 0.76    |

Table S3. Cont.

| m/z     | Rt   | Molecular Formula                                               | Metabolite                                                                                             | p-Value | Ratio D1S3/D1S1 | p(corr) |
|---------|------|-----------------------------------------------------------------|--------------------------------------------------------------------------------------------------------|---------|-----------------|---------|
| 168.03  | 7.8  | C <sub>7</sub> H <sub>7</sub> NO <sub>4</sub>                   | L-2,3-Dihydrodipicolinate                                                                              | 0.02339 | 1.98            | 0.60    |
| 214.027 | 14.0 | C <sub>9</sub> H <sub>10</sub> ClNO <sub>3</sub>                | 3-Chlorotyrosine                                                                                       | 0.00298 | 2.91            | 0.71    |
| 156.077 | 19.1 | C <sub>6</sub> H <sub>9</sub> N <sub>3</sub> O <sub>2</sub>     | L-Histidine                                                                                            | 0.00007 | 1.99            | 0.78    |
| 169.051 | 7.9  | C <sub>8</sub> H <sub>10</sub> O <sub>4</sub>                   | 3,4-Dihydroxyphenylethyleneglycol                                                                      | 0.01602 | 2.17            | 0.63    |
| 260.053 | 12.7 | C <sub>6</sub> H <sub>14</sub> NO <sub>8</sub> P                | D-Glucosamine 6-phosphate                                                                              | 0.00029 | 2.14            | 0.78    |
| 154.062 | 17.2 | C <sub>6</sub> H <sub>9</sub> N <sub>3</sub> O <sub>2</sub>     | L-Histidine                                                                                            | 0.00222 | 2.35            | 0.70    |
| 154.063 | 20.4 | C <sub>6</sub> H <sub>9</sub> N <sub>3</sub> O <sub>2</sub>     | L-Histidine                                                                                            | 0.00026 | 2.10            | 0.79    |
| 207.077 | 4.9  | C <sub>10</sub> H <sub>12</sub> N <sub>2</sub> O <sub>3</sub>   | L-Kynurenine                                                                                           | 0.01873 | 1.58            | 0.54    |
| 217.018 | 4.3  | C <sub>8</sub> H <sub>10</sub> SO <sub>5</sub>                  | phenylethylene glycol sulfate                                                                          | 0.02391 | 2.08            | 0.64    |
| 309.076 | 5.1  | C <sub>18</sub> H <sub>12</sub> O <sub>5</sub>                  | [Fv Methyl(9:1)] 3',4'-Methylenedioxy-[2'',3'':7,8]furanoflavanone                                     | 0.26933 | 2.04            | 0.39    |
| 78.9185 | 13.6 | BrH                                                             | Br-                                                                                                    | 0.00050 | 2.28            | 0.77    |
| 175.119 | 25.3 | C <sub>6</sub> H <sub>14</sub> N <sub>4</sub> O <sub>2</sub>    | L-Arginine                                                                                             | 0.02416 | 1.83            | 0.56    |
| 180.089 | 17.1 | C <sub>7</sub> H <sub>10</sub> N <sub>5</sub> O                 | N1-hydroxyethyladenine                                                                                 | 0.00002 | 2.11            | 0.82    |
| 174.057 | 9.3  | C <sub>10</sub> H <sub>9</sub> NO <sub>2</sub>                  | Indole-3-acetate                                                                                       | 0.01749 | 1.79            | 0.54    |
| 215.033 | 14.1 | C <sub>5</sub> H <sub>13</sub> O <sub>7</sub> P                 | 2-C-Methyl-D-erythritol 4-phosphate                                                                    | 0.01439 | 2.71            | 0.62    |
| 241.129 | 14.6 | C <sub>10</sub> H <sub>16</sub> N <sub>4</sub> O <sub>3</sub>   | Homocarnosine                                                                                          | 0.05667 | 2.67            | 0.46    |
| 230.997 | 6.9  | C <sub>8</sub> H <sub>8</sub> SO <sub>6</sub>                   | hydroxyphenyl acetic acid sulfate or isomer                                                            | 0.03176 | 2.29            | 0.59    |
| 415.094 | 16.0 | C <sub>15</sub> H <sub>20</sub> N <sub>4</sub> O <sub>8</sub> S | O-Carbamoyl-deacetylcephalosporin C                                                                    | 0.01044 | 2.53            | 0.58    |
| 234.077 | 16.3 | C <sub>12</sub> H <sub>11</sub> NO <sub>4</sub>                 | 2-Hydroxy-6-oxo-(2'-aminophenyl)-hexa-2,4-dienoate                                                     | 0.00694 | 1.51            | 0.61    |
| 208.062 | 14.3 | C <sub>10</sub> H <sub>11</sub> NO <sub>4</sub>                 | N-Benzoyloxycarbonylglycine                                                                            | 0.00070 | 1.75            | 0.69    |
| 116.035 | 14.1 | C <sub>4</sub> H <sub>7</sub> NO <sub>3</sub>                   | L-2-Amino-3-oxobutanoic acid                                                                           | 0.00273 | 1.51            | 0.67    |
| 357.169 | 15.0 | C <sub>21</sub> H <sub>24</sub> O <sub>5</sub>                  | [Fv Trihydroxy,trimethy] 2',4',4''-Trihydroxy-3',6'',6''-trimethylpyrano[2'',3'':6',5']dihydrochalcone | 0.03435 | 2.01            | 0.52    |
| 170.092 | 13.5 | C <sub>7</sub> H <sub>11</sub> N <sub>3</sub> O <sub>2</sub>    | N(pi)-Methyl-L-histidine                                                                               | 0.00040 | 1.69            | 0.74    |
| 340.154 | 15.6 | C <sub>20</sub> H <sub>21</sub> NO <sub>4</sub>                 | (S)-Canadine                                                                                           | 0.00114 | 1.58            | 0.70    |
| 114.021 | 14.7 | C <sub>4</sub> H <sub>5</sub> NO <sub>3</sub>                   | Maleamate                                                                                              | 0.02136 | 1.55            | 0.55    |
| 285.119 | 14.8 | C <sub>11</sub> H <sub>16</sub> N <sub>4</sub> O <sub>5</sub>   | Coformycin                                                                                             | 0.00560 | 2.27            | 0.62    |
| 234.077 | 18.0 | C <sub>12</sub> H <sub>11</sub> NO <sub>4</sub>                 | 2-Hydroxy-6-oxo-(2'-aminophenyl)-hexa-2,4-dienoate                                                     | 0.00615 | 1.69            | 0.63    |
| 128.035 | 16.1 | C <sub>5</sub> H <sub>7</sub> NO <sub>3</sub>                   | L-1-Pyrroline-3-hydroxy-5-carboxylate                                                                  | 0.00398 | 1.47            | 0.60    |
| 323.146 | 22.9 | C <sub>12</sub> H <sub>24</sub> N <sub>2</sub> O <sub>8</sub>   | Procollagen 5-(D-galactosyloxy)-L-lysine                                                               | 0.05039 | 2.99            | 0.53    |
| 386.159 | 12.1 | C <sub>21</sub> H <sub>23</sub> NO <sub>6</sub>                 | Polycarpine                                                                                            | 0.00156 | 1.54            | 0.69    |
| 180.086 | 17.1 | C <sub>6</sub> H <sub>13</sub> NO <sub>5</sub>                  | D-Glucosamine                                                                                          | 0.00479 | 1.61            | 0.61    |



Table S3. Cont.

| m/z     | Rt   | Molecular Formula                                               | Metabolite                                                     | p-Value | Ratio D1S3/D1S1 | p(corr) |
|---------|------|-----------------------------------------------------------------|----------------------------------------------------------------|---------|-----------------|---------|
| 157.061 | 11.9 | C <sub>6</sub> H <sub>8</sub> N <sub>2</sub> O <sub>3</sub>     | 4-Imidazolone-5-propanoate                                     | 0.00015 | 1.38            | 0.75    |
| 249.149 | 12.5 | C <sub>15</sub> H <sub>20</sub> O <sub>3</sub>                  | [PR] 1,2-Dihydrosantonin                                       | 0.28230 | 2.11            | 0.40    |
| 267.138 | 6.8  | C <sub>18</sub> H <sub>18</sub> O <sub>2</sub>                  | [ST hydroxy(5:0)] 3-hydroxy-estra-1,3,5(10),6,8-pentaen-17-one | 0.00244 | 0.48            | -0.66   |
| 275.151 | 7.4  | C <sub>14</sub> H <sub>20</sub> N <sub>4</sub> O <sub>2</sub>   | N-(4-Guanidinobutyl)-4-hydroxycinnamide                        | 0.00465 | 0.39            | -0.61   |
| 287.196 | 4.7  | C <sub>14</sub> H <sub>26</sub> N <sub>2</sub> O <sub>4</sub>   | N-Acetyl-leucyl-leucine                                        | 0.00226 | 0.53            | -0.68   |
| 450.176 | 6.5  | C <sub>15</sub> H <sub>27</sub> N <sub>7</sub> O <sub>7</sub> S | Arg-Asp-Cys-Gly                                                | 0.00170 | 0.51            | -0.71   |
| 153.031 | 11.3 | C <sub>6</sub> H <sub>6</sub> N <sub>2</sub> O <sub>3</sub>     | Imidazol-5-yl-pyruvate                                         | 0.00346 | 0.46            | -0.64   |
| 174.087 | 15.0 | C <sub>6</sub> H <sub>11</sub> N <sub>3</sub> O <sub>3</sub>    | 5-Guanidino-2-oxopentanoate                                    | 0.00038 | 0.53            | -0.73   |
| 494.239 | 5.0  | C <sub>25</sub> H <sub>35</sub> NO <sub>9</sub>                 | Ryanodine                                                      | 0.00242 | 0.48            | -0.68   |
| 262.136 | 5.7  | C <sub>14</sub> H <sub>19</sub> N <sub>3</sub> S                | Methapyrilene                                                  | 0.00094 | 0.56            | -0.72   |
| 172.097 | 9.0  | C <sub>8</sub> H <sub>13</sub> NO <sub>3</sub>                  | N-Butyryl-L-homoserine lactone                                 | 0.00021 | 0.50            | -0.74   |
| 245.113 | 9.2  | C <sub>10</sub> H <sub>16</sub> N <sub>2</sub> O <sub>5</sub>   | Glu-Pro                                                        | 0.00047 | 0.56            | -0.74   |
| 451.166 | 8.0  | C <sub>20</sub> H <sub>28</sub> N <sub>4</sub> O <sub>6</sub> S | Ala-Cys-Pro-Tyr                                                | 0.00380 | 0.39            | -0.63   |
| 111.009 | 18.5 | C <sub>5</sub> H <sub>4</sub> O <sub>3</sub>                    | 2-Furoate                                                      | 0.00253 | 0.48            | -0.64   |
| 172.073 | 15.0 | C <sub>6</sub> H <sub>11</sub> N <sub>3</sub> O <sub>3</sub>    | 5-Guanidino-2-oxopentanoate                                    | 0.00020 | 0.45            | -0.76   |
| 500.239 | 4.5  | C <sub>19</sub> H <sub>33</sub> N <sub>9</sub> O <sub>5</sub> S | Arg-Met-Gly-His                                                | 0.00248 | 0.52            | -0.68   |
| 538.232 | 5.0  | C <sub>24</sub> H <sub>35</sub> N <sub>5</sub> O <sub>7</sub> S | Gln-Met-Pro-Tyr                                                | 0.00016 | 0.39            | -0.78   |
| 237.09  | 8.3  | C <sub>8</sub> H <sub>16</sub> N <sub>2</sub> O <sub>4</sub> S  | Met-Ser                                                        | 0.00581 | 0.52            | -0.61   |
| 522.197 | 5.6  | C <sub>18</sub> H <sub>31</sub> N <sub>7</sub> O <sub>9</sub> S | Glu-Asp-Cys-Arg                                                | 0.00234 | 0.40            | -0.69   |
| 210.062 | 5.0  | C <sub>7</sub> H <sub>7</sub> O <sub>3</sub> N <sub>5</sub>     | uric acid acetonitrile adduct                                  | 0.00074 | 0.52            | -0.71   |
| 422.203 | 7.8  | C <sub>19</sub> H <sub>27</sub> N <sub>5</sub> O <sub>6</sub>   | Phe-Gln-Gln                                                    | 0.00230 | 0.53            | -0.65   |
| 492.224 | 5.0  | C <sub>18</sub> H <sub>33</sub> N <sub>7</sub> O <sub>7</sub> S | Ala-Met-Asp-Arg                                                | 0.00130 | 0.50            | -0.70   |
| 241.012 | 14.9 | C <sub>6</sub> H <sub>11</sub> O <sub>8</sub> P                 | D-myo-Inositol 1,2-cyclic phosphate                            | 0.00031 | 0.57            | -0.73   |
| 434.217 | 7.5  | C <sub>23</sub> H <sub>31</sub> NO <sub>7</sub>                 | Mycophenolate mofetil                                          | 0.00049 | 0.43            | -0.70   |
| 102.066 | 16.8 | C <sub>3</sub> H <sub>7</sub> N <sub>3</sub> O                  | N-acetylguanidine                                              | 0.00001 | 0.46            | -0.83   |
| 156.078 | 10.0 | C <sub>6</sub> H <sub>10</sub> N <sub>3</sub> O <sub>2</sub>    | N3-hydroxyethylcytosine                                        | 0.00034 | 0.52            | -0.74   |
| 448.203 | 6.1  | C <sub>17</sub> H <sub>29</sub> N <sub>5</sub> O <sub>9</sub>   | Ala-Lys-Asp-Asp                                                | 0.00023 | 0.48            | -0.76   |
| 234.134 | 12.9 | C <sub>10</sub> H <sub>19</sub> NO <sub>5</sub>                 | Hydroxypropionylcarnitine                                      | 0.00219 | 0.52            | -0.66   |
| 176.103 | 16.2 | C <sub>6</sub> H <sub>13</sub> N <sub>3</sub> O <sub>3</sub>    | L-Citrulline                                                   | 0.00044 | 0.59            | -0.77   |
| 219.134 | 13.7 | C <sub>9</sub> H <sub>18</sub> N <sub>2</sub> O <sub>4</sub>    | N2-(D-1-Carboxyethyl)-L-lysine                                 | 0.00014 | 0.47            | -0.77   |
| 138.091 | 22.4 | C <sub>8</sub> H <sub>11</sub> NO                               | Tyramine                                                       | 0.00118 | 0.53            | -0.70   |
| 290.102 | 4.9  | C <sub>15</sub> H <sub>15</sub> NO <sub>5</sub>                 | Acronycidine                                                   | 0.00020 | 0.49            | -0.77   |

Table S3. Cont.

| m/z     | Rt   | Molecular Formula                                               | Metabolite                                       | p-Value | Ratio D1S3/D1S1 | p(corr) |
|---------|------|-----------------------------------------------------------------|--------------------------------------------------|---------|-----------------|---------|
| 336.217 | 6.2  | C <sub>19</sub> H <sub>29</sub> NO <sub>4</sub>                 | Ankorine                                         | 0.00013 | 0.56            | -0.77   |
| 189.123 | 13.6 | C <sub>8</sub> H <sub>16</sub> N <sub>2</sub> O <sub>3</sub>    | Glycyl-leucine                                   | 0.00013 | 0.54            | -0.77   |
| 207.114 | 20.0 | C <sub>11</sub> H <sub>14</sub> N <sub>2</sub> O <sub>2</sub>   | Phenylethylmalonamide                            | 0.00001 | 0.56            | -0.85   |
| 374.254 | 7.2  | C <sub>19</sub> H <sub>35</sub> NO <sub>6</sub>                 | Dodecanedioylcarnitine                           | 0.00001 | 0.51            | -0.84   |
| 173.009 | 18.4 | C <sub>6</sub> H <sub>6</sub> O <sub>6</sub>                    | cis-Aconitate                                    | 0.00267 | 0.40            | -0.64   |
| 129.019 | 18.5 | C <sub>5</sub> H <sub>6</sub> O <sub>4</sub>                    | Mesaconate                                       | 0.00237 | 0.42            | -0.65   |
| 278.198 | 5.2  | C <sub>14</sub> H <sub>23</sub> N <sub>5</sub> O                | EHNA                                             | 0.00034 | 0.41            | -0.78   |
| 146.081 | 9.8  | C <sub>6</sub> H <sub>11</sub> NO <sub>3</sub>                  | [FA oxo,amino(6:0)] 3-oxo-5S-amino-hexanoic acid | 0.00013 | 0.54            | -0.77   |
| 493.208 | 8.0  | C <sub>25</sub> H <sub>34</sub> O <sub>10</sub>                 | Glucarubinone                                    | 0.00082 | 0.20            | -0.56   |
| 288.171 | 4.7  | C <sub>16</sub> H <sub>21</sub> N <sub>3</sub> O <sub>2</sub>   | Zolmitriptan                                     | 0.00195 | 0.51            | -0.68   |
| 203.139 | 14.6 | C <sub>9</sub> H <sub>18</sub> N <sub>2</sub> O <sub>3</sub>    | Leu-Ala                                          | 0.00016 | 0.58            | -0.79   |
| 476.199 | 5.5  | C <sub>18</sub> H <sub>29</sub> N <sub>5</sub> O <sub>10</sub>  | Asn-Leu-Asp-Asp                                  | 0.00415 | 0.48            | -0.62   |
| 258.11  | 15.2 | C <sub>8</sub> H <sub>20</sub> NO <sub>6</sub> P                | sn-glycero-3-Phosphocholine                      | 0.00108 | 0.55            | -0.70   |
| 500.247 | 4.5  | C <sub>20</sub> H <sub>33</sub> N <sub>7</sub> O <sub>8</sub>   | Asp-Lys-Thr-His                                  | 0.00106 | 0.52            | -0.72   |
| 334.203 | 6.2  | C <sub>19</sub> H <sub>29</sub> NO <sub>4</sub>                 | Ankorine                                         | 0.00579 | 0.48            | -0.59   |
| 220.029 | 15.6 | C <sub>7</sub> H <sub>11</sub> NO <sub>5</sub> S                | S-(3-oxo-3-carboxy-n-propyl)cysteine             | 0.00138 | 0.53            | -0.70   |
| 218.114 | 11.8 | C <sub>8</sub> H <sub>15</sub> N <sub>3</sub> O <sub>4</sub>    | N-Acetyl-L-citrulline                            | 0.00001 | 0.57            | -0.83   |
| 490.207 | 5.0  | C <sub>18</sub> H <sub>31</sub> N <sub>7</sub> O <sub>7</sub> S | Arg-Asp-Cys-Pro                                  | 0.00156 | 0.51            | -0.71   |
| 178.107 | 16.2 | C <sub>7</sub> H <sub>15</sub> NO <sub>4</sub>                  | validamine                                       | 0.00060 | 0.56            | -0.75   |
| 221.092 | 10.7 | C <sub>11</sub> H <sub>12</sub> N <sub>2</sub> O <sub>3</sub>   | 5-Hydroxy-L-tryptophan                           | 0.00066 | 0.52            | -0.74   |
| 165.075 | 13.4 | C <sub>6</sub> H <sub>12</sub> O <sub>5</sub>                   | L-Rhamnose                                       | 0.00042 | 0.52            | -0.74   |
| 233.114 | 10.9 | C <sub>9</sub> H <sub>16</sub> N <sub>2</sub> O <sub>5</sub>    | N2-Succinyl-L-ornithine                          | 0.00196 | 0.52            | -0.64   |
| 288.217 | 6.4  | C <sub>15</sub> H <sub>29</sub> NO <sub>4</sub>                 | L-Octanoylcarnitine                              | 0.00161 | 0.54            | -0.69   |
| 283.129 | 5.5  | C <sub>13</sub> H <sub>18</sub> N <sub>2</sub> O <sub>5</sub>   | Thr-Tyr                                          | 0.00135 | 0.49            | -0.71   |
| 219.081 | 14.9 | C <sub>8</sub> H <sub>16</sub> N <sub>2</sub> O <sub>3</sub> S  | Met-Ala                                          | 0.00027 | 0.52            | -0.72   |
| 187.108 | 9.8  | C <sub>8</sub> H <sub>14</sub> N <sub>2</sub> O <sub>3</sub>    | Ala-Pro                                          | 0.00004 | 0.52            | -0.81   |
| 295.132 | 6.0  | C <sub>19</sub> H <sub>18</sub> O <sub>3</sub>                  | (2-Butylbenzofuran-3-yl)(4-hydroxyphenyl)ketone  | 0.00117 | 0.59            | -0.69   |
| 145.014 | 16.2 | C <sub>5</sub> H <sub>6</sub> O <sub>5</sub>                    | 2-Oxoglutarate                                   | 0.00348 | 0.47            | -0.63   |
| 480.187 | 7.9  | C <sub>16</sub> H <sub>29</sub> N <sub>7</sub> O <sub>8</sub> S | Arg-Asp-Cys-Ser                                  | 0.00143 | 0.44            | -0.70   |
| 220.118 | 13.2 | C <sub>9</sub> H <sub>17</sub> NO <sub>5</sub>                  | Pantothenate                                     | 0.00146 | 0.53            | -0.69   |
| 153.066 | 11.9 | C <sub>7</sub> H <sub>8</sub> N <sub>2</sub> O <sub>2</sub>     | N1-Methyl-2-pyridone-5-carboxamide               | 0.00096 | 0.52            | -0.68   |
| 257.113 | 9.6  | C <sub>11</sub> H <sub>16</sub> N <sub>2</sub> O <sub>5</sub>   | 1-(beta-D-Ribofuranosyl)-1,4-dihydronicotinamide | 0.00116 | 0.56            | -0.71   |

Table S3. Cont.

| m/z     | Rt   | Molecular Formula                                               | Metabolite                            | p-Value | Ratio D1S3/D1S1 | p(corr) |
|---------|------|-----------------------------------------------------------------|---------------------------------------|---------|-----------------|---------|
| 450.235 | 5.5  | C <sub>21</sub> H <sub>31</sub> N <sub>5</sub> O <sub>6</sub>   | Ala-Phe-Val-Asn                       | 0.00007 | 0.45            | -0.78   |
| 248.113 | 14.1 | C <sub>10</sub> H <sub>17</sub> NO <sub>6</sub>                 | Linamarin                             | 0.00032 | 0.51            | -0.75   |
| 350.16  | 7.2  | C <sub>18</sub> H <sub>23</sub> NO <sub>6</sub>                 | Riddelline                            | 0.00378 | 0.52            | -0.64   |
| 217.129 | 15.6 | C <sub>8</sub> H <sub>16</sub> N <sub>4</sub> O <sub>3</sub>    | N-acetyl-(L)-arginine                 | 0.00001 | 0.54            | -0.85   |
| 247.092 | 11.3 | C <sub>9</sub> H <sub>14</sub> N <sub>2</sub> O <sub>6</sub>    | 5-6-Dihydrouridine                    | 0.00016 | 0.55            | -0.76   |
| 368.155 | 13.4 | C <sub>14</sub> H <sub>25</sub> NO <sub>10</sub>                | N-Acetyl-6-O-L-fucosyl-D-glucosamine  | 0.02483 | 0.33            | -0.51   |
| 287.148 | 12.1 | C <sub>10</sub> H <sub>20</sub> N <sub>6</sub> O <sub>4</sub>   | Asn-Arg                               | 0.00005 | 0.31            | -0.79   |
| 204.134 | 12.7 | C <sub>8</sub> H <sub>17</sub> N <sub>3</sub> O <sub>3</sub>    | Lys-Gly                               | 0.00142 | 0.52            | -0.70   |
| 118.086 | 14.6 | C <sub>5</sub> H <sub>11</sub> NO <sub>2</sub>                  | L-Valine                              | 0.00124 | 0.52            | -0.73   |
| 403.192 | 5.0  | C <sub>26</sub> H <sub>28</sub> O <sub>4</sub>                  | [Fv] Boesenbergin A                   | 0.00029 | 0.51            | -0.73   |
| 245.15  | 8.8  | C <sub>11</sub> H <sub>20</sub> N <sub>2</sub> O <sub>4</sub>   | N-hexenoylglutamine                   | 0.00007 | 0.48            | -0.83   |
| 464.192 | 5.4  | C <sub>16</sub> H <sub>29</sub> N <sub>7</sub> O <sub>7</sub> S | Ala-Asp-Cys-Arg                       | 0.00097 | 0.48            | -0.73   |
| 386.255 | 8.3  | C <sub>21</sub> H <sub>31</sub> N <sub>5</sub> O <sub>2</sub>   | Buspirone                             | 0.00015 | 0.41            | -0.75   |
| 310.113 | 14.2 | C <sub>11</sub> H <sub>19</sub> NO <sub>9</sub>                 | N-Acetylneuraminate                   | 0.00006 | 0.58            | -0.78   |
| 163.108 | 9.8  | C <sub>6</sub> H <sub>14</sub> N <sub>2</sub> O <sub>3</sub>    | N6-Hydroxy-L-lysine                   | 0.00004 | 0.44            | -0.83   |
| 346.124 | 14.8 | C <sub>15</sub> H <sub>24</sub> NO <sub>4</sub> PS              | Isofenphos                            | 0.00081 | 0.53            | -0.71   |
| 288.171 | 8.8  | C <sub>16</sub> H <sub>21</sub> N <sub>3</sub> O <sub>2</sub>   | Zolmitriptan                          | 0.00010 | 0.46            | -0.76   |
| 313.062 | 11.2 | C <sub>10</sub> H <sub>20</sub> O <sub>7</sub> P <sub>2</sub>   | [PR] Geranyl pyrophosphate            | 0.00019 | 0.33            | -0.74   |
| 288.125 | 12.0 | C <sub>16</sub> H <sub>19</sub> NO <sub>4</sub>                 | 3'-Demethoxyplartine                  | 0.00067 | 0.27            | -0.64   |
| 167.021 | 13.5 | C <sub>5</sub> H <sub>4</sub> N <sub>4</sub> O <sub>3</sub>     | Urate                                 | 0.00019 | 0.53            | -0.76   |
| 379.163 | 9.3  | C <sub>17</sub> H <sub>24</sub> N <sub>4</sub> O <sub>6</sub>   | Ala-Gln-Tyr                           | 0.00302 | 0.48            | -0.64   |
| 253.143 | 5.2  | C <sub>14</sub> H <sub>20</sub> O <sub>4</sub>                  | ubiquinol-1                           | 0.00007 | 0.53            | -0.79   |
| 253.123 | 7.7  | C <sub>17</sub> H <sub>16</sub> O <sub>2</sub>                  | cis-Hinokiresinol                     | 0.00448 | 0.41            | -0.64   |
| 417.211 | 7.2  | C <sub>16</sub> H <sub>30</sub> N <sub>6</sub> O <sub>7</sub>   | Ala-Lys-Asn-Ser                       | 0.00094 | 0.40            | -0.70   |
| 341.101 | 14.6 | C <sub>19</sub> H <sub>16</sub> O <sub>6</sub>                  | Psorospermin                          | 0.00568 | 0.44            | -0.60   |
| 175.072 | 12.4 | C <sub>6</sub> H <sub>12</sub> N <sub>2</sub> O <sub>4</sub>    | Ala-Ser                               | 0.00056 | 0.54            | -0.71   |
| 431.177 | 4.0  | C <sub>17</sub> H <sub>26</sub> N <sub>4</sub> O <sub>9</sub>   | Glu-Ala-Asp-Pro                       | 0.00143 | 0.48            | -0.70   |
| 384.274 | 5.7  | C <sub>21</sub> H <sub>37</sub> NO <sub>5</sub>                 | 3-Hydroxy-5, 8-tetradecadiencarnitine | 0.00018 | 0.50            | -0.76   |
| 326.087 | 11.1 | C <sub>14</sub> H <sub>15</sub> NO <sub>8</sub>                 | Pancreatistatin                       | 0.00045 | 0.52            | -0.74   |
| 230.116 | 13.4 | C <sub>9</sub> H <sub>16</sub> N <sub>5</sub> Cl                | Propazine                             | 0.00007 | 0.45            | -0.79   |
| 402.285 | 6.4  | C <sub>21</sub> H <sub>39</sub> NO <sub>6</sub>                 | [SP] Myriocin                         | 0.00046 | 0.47            | -0.74   |
| 175.108 | 9.3  | C <sub>7</sub> H <sub>14</sub> N <sub>2</sub> O <sub>3</sub>    | N-Acetylmornithine                    | 0.00016 | 0.57            | -0.77   |

Table S3. Cont.

| m/z     | Rt   | Molecular Formula                                               | Metabolite                                                                                  | p-Value | Ratio D1S3/D1S1 | p(corr) |
|---------|------|-----------------------------------------------------------------|---------------------------------------------------------------------------------------------|---------|-----------------|---------|
| 131.118 | 20.5 | C <sub>6</sub> H <sub>14</sub> N <sub>2</sub> O                 | N-Acetylputrescine                                                                          | 0.00331 | 0.55            | -0.66   |
| 120.066 | 12.0 | C <sub>4</sub> H <sub>9</sub> NO <sub>3</sub>                   | L-Threonine                                                                                 | 0.00009 | 0.42            | -0.80   |
| 327.139 | 14.2 | C <sub>20</sub> H <sub>19</sub> FO <sub>3</sub>                 | 2,2,4-Trimethyl-3-(4-fluorophenyl)-2H-1-benzopyran-7-ol acetate                             | 0.00007 | 0.55            | -0.78   |
| 205.035 | 17.8 | C <sub>7</sub> H <sub>10</sub> O <sub>7</sub>                   | 2-Hydroxybutane-1,2,4-tricarboxylate                                                        | 0.00138 | 0.49            | -0.73   |
| 487.256 | 8.1  | C <sub>25</sub> H <sub>36</sub> N <sub>4</sub> O <sub>6</sub>   | Ile-Pro-Pro-Tyr                                                                             | 0.00153 | 0.25            | -0.68   |
| 389.182 | 8.6  | C <sub>19</sub> H <sub>26</sub> N <sub>4</sub> O <sub>5</sub>   | Phe-Gln-Pro                                                                                 | 0.00025 | 0.42            | -0.74   |
| 227.127 | 22.4 | C <sub>12</sub> H <sub>18</sub> O <sub>4</sub>                  | [FA oxo,hydroxy(5:1/5:0)] (1S,2R)-3-oxo-2-(5'-hydroxy-2'Z-pentenyl)-cyclopentaneacetic acid | 0.00840 | 0.53            | -0.60   |
| 336.158 | 7.7  | C <sub>13</sub> H <sub>25</sub> N <sub>3</sub> O <sub>5</sub> S | Leu-Thr-Cys                                                                                 | 0.00430 | 0.55            | -0.63   |
| 274.092 | 14.1 | C <sub>12</sub> H <sub>19</sub> NO <sub>2</sub> S <sub>2</sub>  | Brugine                                                                                     | 0.00003 | 0.48            | -0.80   |
| 216.099 | 11.8 | C <sub>8</sub> H <sub>15</sub> N <sub>3</sub> O <sub>4</sub>    | N-Acetyl-L-citrulline                                                                       | 0.00501 | 0.55            | -0.62   |
| 431.197 | 7.5  | C <sub>18</sub> H <sub>32</sub> N <sub>4</sub> O <sub>6</sub> S | Cys-Leu-Thr-Pro                                                                             | 0.00444 | 0.47            | -0.62   |
| 290.089 | 10.2 | C <sub>11</sub> H <sub>17</sub> NO <sub>8</sub>                 | 2,7-Anhydro-alpha-N-acetylneuraminic acid                                                   | 0.01615 | 0.41            | -0.59   |
| 157.992 | 7.5  | C <sub>5</sub> H <sub>5</sub> NO <sub>3</sub> S                 | 3-pyridinesulfonate                                                                         | 0.01051 | 0.42            | -0.56   |
| 472.25  | 4.3  | C <sub>19</sub> H <sub>33</sub> N <sub>7</sub> O <sub>7</sub>   | Asn-Lys-Asn-Pro                                                                             | 0.00001 | 0.45            | -0.83   |
| 235.092 | 12.8 | C <sub>8</sub> H <sub>14</sub> N <sub>2</sub> O <sub>6</sub>    | Glu-Ser                                                                                     | 0.00007 | 0.52            | -0.80   |
| 166.05  | 5.1  | C <sub>8</sub> H <sub>7</sub> NO <sub>3</sub>                   | Formylanthranilate                                                                          | 0.00117 | 0.57            | -0.69   |
| 260.089 | 15.6 | C <sub>9</sub> H <sub>15</sub> N <sub>3</sub> O <sub>6</sub>    | Ala-Asp-Gly                                                                                 | 0.01361 | 0.44            | -0.60   |
| 330.19  | 5.0  | C <sub>16</sub> H <sub>27</sub> NO <sub>6</sub>                 | Europine                                                                                    | 0.00011 | 0.49            | -0.77   |
| 259.092 | 13.7 | C <sub>10</sub> H <sub>14</sub> N <sub>2</sub> O <sub>6</sub>   | (1-Ribosylimidazole)-4-acetate                                                              | 0.00006 | 0.49            | -0.80   |
| 494.193 | 5.7  | C <sub>18</sub> H <sub>31</sub> N <sub>5</sub> O <sub>9</sub> S | Asp-Met-Thr-Gln                                                                             | 0.00334 | 0.20            | -0.71   |
| 231.17  | 13.7 | C <sub>11</sub> H <sub>22</sub> N <sub>2</sub> O <sub>3</sub>   | Leu-Val                                                                                     | 0.00024 | 0.46            | -0.77   |
| 344.182 | 5.0  | C <sub>15</sub> H <sub>25</sub> N <sub>3</sub> O <sub>6</sub>   | Leu-Asp-Pro                                                                                 | 0.00001 | 0.43            | -0.83   |
| 247.132 | 8.4  | C <sub>15</sub> H <sub>18</sub> O <sub>3</sub>                  | [PR] alpha-Santonin                                                                         | 0.00003 | 0.46            | -0.80   |
| 282.12  | 13.9 | C <sub>11</sub> H <sub>15</sub> N <sub>5</sub> O <sub>4</sub>   | 1-Methyladenosine                                                                           | 0.00042 | 0.52            | -0.77   |
| 420.189 | 5.1  | C <sub>19</sub> H <sub>25</sub> N <sub>5</sub> O <sub>6</sub>   | Thr-Trp-Asn                                                                                 | 0.00007 | 0.44            | -0.81   |
| 272.172 | 5.3  | C <sub>11</sub> H <sub>21</sub> N <sub>5</sub> O <sub>3</sub>   | Pro-Arg                                                                                     | 0.00012 | 0.41            | -0.78   |
| 164.074 | 13.3 | C <sub>6</sub> H <sub>13</sub> NO <sub>2</sub> S                | S-Methyl-L-methionine                                                                       | 0.00105 | 0.49            | -0.72   |
| 290.088 | 12.5 | C <sub>11</sub> H <sub>17</sub> NO <sub>8</sub>                 | 2,7-Anhydro-alpha-N-acetylneuraminic acid                                                   | 0.00080 | 0.50            | -0.69   |
| 283.123 | 13.9 | C <sub>20</sub> H <sub>14</sub> N <sub>2</sub>                  | 2,3-Diphenyl-3-(2-pyridinyl)acrylonitrile                                                   | 0.00045 | 0.51            | -0.76   |
| 217.118 | 9.3  | C <sub>9</sub> H <sub>16</sub> N <sub>2</sub> O <sub>4</sub>    | gamma-Glutamyl-gamma-aminobutyraldehyde                                                     | 0.00006 | 0.51            | -0.81   |
| 170.092 | 10.4 | C <sub>7</sub> H <sub>11</sub> N <sub>3</sub> O <sub>2</sub>    | N(pi)-Methyl-L-histidine                                                                    | 0.00002 | 0.44            | -0.83   |

Table S3. Cont.

| m/z     | Rt   | Molecular Formula                                                 | Metabolite                                        | p-Value | Ratio D1S3/D1S1 | p(corr) |
|---------|------|-------------------------------------------------------------------|---------------------------------------------------|---------|-----------------|---------|
| 512.287 | 5.0  | C <sub>27</sub> H <sub>37</sub> N <sub>5</sub> O <sub>5</sub>     | Ala-Lys-Phe-Phe                                   | 0.00004 | 0.41            | -0.82   |
| 360.24  | 5.2  | C <sub>19</sub> H <sub>29</sub> N <sub>5</sub> O <sub>2</sub>     | Loxidine                                          | 0.00237 | 0.57            | -0.66   |
| 244.154 | 8.8  | C <sub>12</sub> H <sub>21</sub> NO <sub>4</sub>                   | Tiglylcarnitine                                   | 0.00004 | 0.43            | -0.82   |
| 221.096 | 12.9 | C <sub>8</sub> H <sub>16</sub> N <sub>2</sub> O <sub>3</sub> S    | Met-Ala                                           | 0.00294 | 0.52            | -0.66   |
| 462.199 | 6.4  | C <sub>21</sub> H <sub>27</sub> N <sub>5</sub> O <sub>7</sub>     | Ala-Trp-Ala-Asp                                   | 0.00014 | 0.42            | -0.81   |
| 312.13  | 9.2  | C <sub>12</sub> H <sub>17</sub> N <sub>5</sub> O <sub>5</sub>     | 1-7-Dimethylguanosine                             | 0.00255 | 0.56            | -0.66   |
| 206.102 | 15.9 | C <sub>8</sub> H <sub>15</sub> NO <sub>5</sub>                    | N-Acetyl-D-fucosamine                             | 0.00054 | 0.45            | -0.75   |
| 450.23  | 5.0  | C <sub>16</sub> H <sub>31</sub> N <sub>7</sub> O <sub>8</sub>     | Arg-Thr-Ser-Ser                                   | 0.00001 | 0.46            | -0.84   |
| 261.145 | 8.9  | C <sub>11</sub> H <sub>20</sub> N <sub>2</sub> O <sub>5</sub>     | Glu-Leu                                           | 0.00006 | 0.43            | -0.82   |
| 294.1   | 13.8 | C <sub>14</sub> H <sub>16</sub> N <sub>3</sub> O <sub>2</sub> Cl  | Triadimefon                                       | 0.00410 | 0.48            | -0.61   |
| 184.061 | 5.1  | C <sub>8</sub> H <sub>9</sub> NO <sub>4</sub>                     | 4-Pyridoxate                                      | 0.00054 | 0.53            | -0.73   |
| 245.149 | 7.3  | C <sub>11</sub> H <sub>20</sub> N <sub>2</sub> O <sub>4</sub>     | N-hexenoylglutamine                               | 0.00080 | 0.51            | -0.71   |
| 232.129 | 10.9 | C <sub>9</sub> H <sub>17</sub> N <sub>3</sub> O <sub>4</sub>      | Ala-Ala-Ala                                       | 0.00077 | 0.46            | -0.70   |
| 320.062 | 20.4 | C <sub>11</sub> H <sub>15</sub> NO <sub>10</sub>                  | beta-Citryl-L-glutamic acid                       | 0.14503 | 0.52            | -0.57   |
| 188.057 | 14.9 | C <sub>7</sub> H <sub>11</sub> NO <sub>5</sub>                    | N-Acetyl-L-glutamate                              | 0.00005 | 0.40            | -0.78   |
| 333.115 | 11.1 | C <sub>13</sub> H <sub>21</sub> N <sub>4</sub> O <sub>2</sub> ClS | Tos-Arg-CH <sub>2</sub> Cl                        | 0.00362 | 0.46            | -0.62   |
| 333.105 | 7.8  | C <sub>11</sub> H <sub>18</sub> N <sub>4</sub> O <sub>8</sub>     | Asn-Asp-Ser                                       | 0.00723 | 0.50            | -0.58   |
| 526.265 | 5.5  | C <sub>27</sub> H <sub>35</sub> N <sub>5</sub> O <sub>6</sub>     | Asn-Phe-Phe-Val                                   | 0.00549 | 0.53            | -0.62   |
| 357.213 | 14.3 | C <sub>16</sub> H <sub>28</sub> N <sub>4</sub> O <sub>5</sub>     | Leu-Gln-Pro                                       | 0.00013 | 0.47            | -0.77   |
| 222.09  | 15.7 | C <sub>8</sub> H <sub>16</sub> NO <sub>4</sub> P                  | D,L-cyclohexanephosphinothricin                   | 0.00097 | 0.55            | -0.69   |
| 392.155 | 12.5 | C <sub>16</sub> H <sub>25</sub> NO <sub>10</sub>                  | Proacaciberin                                     | 0.00015 | 0.39            | -0.78   |
| 234.145 | 9.3  | C <sub>9</sub> H <sub>19</sub> N <sub>3</sub> O <sub>4</sub>      | Lys-Ser                                           | 0.00008 | 0.45            | -0.81   |
| 296.136 | 17.8 | C <sub>12</sub> H <sub>17</sub> N <sub>5</sub> O <sub>4</sub>     | N <sub>6</sub> ,N <sub>6</sub> -Dimethyladenosine | 0.00195 | 0.49            | -0.69   |
| 530.333 | 6.3  | C <sub>28</sub> H <sub>43</sub> N <sub>5</sub> O <sub>5</sub>     | Ile-Leu-Trp-Val                                   | 0.00106 | 0.50            | -0.70   |
| 192.106 | 17.8 | C <sub>8</sub> H <sub>17</sub> NO <sub>2</sub> S                  | trihomomethionine                                 | 0.00549 | 0.48            | -0.60   |
| 478.192 | 9.8  | C <sub>21</sub> H <sub>27</sub> N <sub>5</sub> O <sub>8</sub>     | Ala-Trp-Asp-Ser                                   | 0.00201 | 0.34            | -0.64   |
| 301.077 | 8.5  | C <sub>10</sub> H <sub>12</sub> N <sub>4</sub> O <sub>7</sub>     | urate-3-ribonucleoside                            | 0.00745 | 0.28            | -0.66   |
| 531.336 | 6.3  | C <sub>21</sub> H <sub>42</sub> N <sub>10</sub> O <sub>6</sub>    | Arg-Leu-Ser-Arg                                   | 0.00055 | 0.44            | -0.73   |
| 400.27  | 6.3  | C <sub>21</sub> H <sub>39</sub> NO <sub>6</sub>                   | [SP] Myriocin                                     | 0.00400 | 0.39            | -0.60   |
| 790.56  | 3.8  | C <sub>42</sub> H <sub>80</sub> NO <sub>10</sub> P                | PS(18:0/18:1(9Z))                                 | 0.00432 | 0.53            | -0.63   |
| 331.175 | 11.7 | C <sub>16</sub> H <sub>26</sub> O <sub>7</sub>                    | 8-Epiiridodial glucoside                          | 0.00030 | 0.42            | -0.73   |
| 220.12  | 14.1 | C <sub>10</sub> H <sub>15</sub> N <sub>5</sub> O                  | Dihydrozeatin                                     | 0.00146 | 0.49            | -0.66   |

Table S3. Cont.

| m/z     | Rt   | Molecular Formula                                               | Metabolite                                             | p-Value | Ratio D1S3/D1S1 | p(corr) |
|---------|------|-----------------------------------------------------------------|--------------------------------------------------------|---------|-----------------|---------|
| 271.165 | 5.2  | C <sub>13</sub> H <sub>22</sub> N <sub>2</sub> O <sub>4</sub>   | N-octadienoylglutamine                                 | 0.00001 | 0.44            | -0.86   |
| 229.155 | 10.7 | C <sub>11</sub> H <sub>20</sub> N <sub>2</sub> O <sub>3</sub>   | Leu-Pro                                                | 0.00017 | 0.48            | -0.79   |
| 258.17  | 8.1  | C <sub>13</sub> H <sub>23</sub> NO <sub>4</sub>                 | 2-Hexenoylcarnitine                                    | 0.00175 | 0.49            | -0.68   |
| 237.077 | 10.8 | C <sub>12</sub> H <sub>14</sub> O <sub>5</sub>                  | 3-4-5-Trimethoxycinnamicacid                           | 0.00069 | 0.44            | -0.69   |
| 288.121 | 13.8 | C <sub>11</sub> H <sub>19</sub> N <sub>3</sub> O <sub>6</sub>   | Pro-Ser-Ser                                            | 0.00010 | 0.30            | -0.72   |
| 474.231 | 4.5  | C <sub>18</sub> H <sub>31</sub> N <sub>7</sub> O <sub>8</sub>   | Ala-Gln-Gln-Gln                                        | 0.00002 | 0.44            | -0.83   |
| 462.233 | 9.2  | C <sub>22</sub> H <sub>31</sub> N <sub>5</sub> O <sub>6</sub>   | Ala-Phe-Gln-Pro                                        | 0.00009 | 0.45            | -0.81   |
| 218.156 | 13.2 | C <sub>11</sub> H <sub>23</sub> NOS                             | Butylate                                               | 0.00029 | 0.51            | -0.75   |
| 295.165 | 4.8  | C <sub>13</sub> H <sub>22</sub> N <sub>5</sub> O <sub>3</sub>   | diphthamide                                            | 0.00239 | 0.52            | -0.64   |
| 217.155 | 13.2 | C <sub>10</sub> H <sub>20</sub> N <sub>2</sub> O <sub>3</sub>   | Val-Val                                                | 0.00009 | 0.45            | -0.82   |
| 330.227 | 6.8  | C <sub>17</sub> H <sub>31</sub> NO <sub>5</sub>                 | 6-Keto-decanoylcarnitine                               | 0.00003 | 0.45            | -0.83   |
| 358.197 | 10.8 | C <sub>16</sub> H <sub>27</sub> N <sub>3</sub> O <sub>6</sub>   | Glu-Ile-Pro                                            | 0.00010 | 0.19            | -0.76   |
| 199.083 | 11.2 | C <sub>7</sub> H <sub>10</sub> N <sub>4</sub> O <sub>3</sub>    | 5-Acetylamino-6-amino-3-methyluracil                   | 0.00000 | 0.48            | -0.84   |
| 227.103 | 13.6 | C <sub>10</sub> H <sub>16</sub> N <sub>2</sub> O <sub>4</sub>   | (S)-ATPA                                               | 0.00063 | 0.44            | -0.72   |
| 216.087 | 14.2 | C <sub>9</sub> H <sub>13</sub> NO <sub>5</sub>                  | Succinyl proline                                       | 0.00173 | 0.40            | -0.69   |
| 220.029 | 11.1 | C <sub>7</sub> H <sub>11</sub> NO <sub>5</sub> S                | S-(3-oxo-3-carboxy-n-propyl)cysteine                   | 0.00024 | 0.23            | -0.75   |
| 203.139 | 13.5 | C <sub>9</sub> H <sub>18</sub> N <sub>2</sub> O <sub>3</sub>    | Leu-Ala                                                | 0.00186 | 0.49            | -0.70   |
| 261.122 | 15.1 | C <sub>14</sub> H <sub>16</sub> N <sub>2</sub> O <sub>3</sub>   | Maculosin                                              | 0.00056 | 0.37            | -0.71   |
| 304.129 | 8.5  | C <sub>15</sub> H <sub>17</sub> N <sub>3</sub> O <sub>4</sub>   | indole-3-acetyl-glutamine                              | 0.00098 | 0.49            | -0.71   |
| 233.046 | 11.2 | C <sub>12</sub> H <sub>10</sub> O <sub>5</sub>                  | 2-Hydroxy-6-oxo-6-(2-hydroxyphenyl)-hexa-2,4-dienoate  | 0.00573 | 0.36            | -0.58   |
| 262.038 | 16.0 | C <sub>9</sub> H <sub>11</sub> NSO <sub>6</sub>                 | tyrosine sulfate                                       | 0.00029 | 0.46            | -0.78   |
| 316.212 | 7.2  | C <sub>16</sub> H <sub>29</sub> NO <sub>5</sub>                 | Butoctamide hydrogen succinate                         | 0.00007 | 0.43            | -0.81   |
| 174.041 | 15.3 | C <sub>6</sub> H <sub>9</sub> NO <sub>5</sub>                   | [FA amino,oxo(6:0/2:0)] 2-amino-3-oxo-hexanedioic acid | 0.00130 | 0.50            | -0.69   |
| 261.138 | 12.8 | C <sub>18</sub> H <sub>16</sub> N <sub>2</sub>                  | N,N'-Diphenyl-p-phenylenediamine                       | 0.00049 | 0.51            | -0.70   |
| 201.16  | 16.3 | C <sub>10</sub> H <sub>20</sub> N <sub>2</sub> O <sub>2</sub>   | dimethylsuberimidate                                   | 0.00075 | 0.43            | -0.73   |
| 303.083 | 17.4 | C <sub>11</sub> H <sub>16</sub> N <sub>2</sub> O <sub>8</sub>   | N-Acetyl-aspartyl-glutamate                            | 0.00514 | 0.38            | -0.61   |
| 412.168 | 6.4  | C <sub>22</sub> H <sub>25</sub> N <sub>3</sub> O <sub>3</sub> S | Ro 18-5364                                             | 0.00005 | 0.45            | -0.82   |
| 255.097 | 24.5 | C <sub>11</sub> H <sub>14</sub> N <sub>2</sub> O <sub>5</sub>   | N-Ribosylnicotinamide                                  | 0.00083 | 0.46            | -0.74   |
| 116.107 | 16.7 | C <sub>6</sub> H <sub>13</sub> NO                               | Trimethylaminoacetone                                  | 0.00110 | 0.43            | -0.71   |
| 188.056 | 13.9 | C <sub>7</sub> H <sub>11</sub> NO <sub>5</sub>                  | N-Acetyl-L-glutamate                                   | 0.00155 | 0.52            | -0.67   |
| 266.139 | 8.7  | C <sub>14</sub> H <sub>19</sub> NO <sub>4</sub>                 | N(alpha)-Benzyloxycarbonyl-L-leucine                   | 0.00026 | 0.42            | -0.77   |
| 229.155 | 13.8 | C <sub>11</sub> H <sub>20</sub> N <sub>2</sub> O <sub>3</sub>   | Leu-Pro                                                | 0.00027 | 0.45            | -0.78   |

Table S3. Cont.

| m/z     | Rt   | Molecular Formula                                               | Metabolite                                                                                                                   | p-Value | Ratio D1S3/D1S1 | p(corr) |
|---------|------|-----------------------------------------------------------------|------------------------------------------------------------------------------------------------------------------------------|---------|-----------------|---------|
| 724.528 | 4.0  | C <sub>41</sub> H <sub>74</sub> NO <sub>7</sub> P               | PE(18:3(6Z,9Z,12Z)/P-18:1(11Z))                                                                                              | 0.00118 | 0.46            | -0.70   |
| 279.064 | 16.0 | C <sub>17</sub> H <sub>10</sub> O <sub>4</sub>                  | [Fv Hydrox] 4-Hydroxyfurano[2'',3''':6,7]aurone                                                                              | 0.00028 | 0.44            | -0.78   |
| 475.247 | 7.0  | C <sub>30</sub> H <sub>34</sub> O <sub>5</sub>                  | [Fv] Poinsettifolin B                                                                                                        | 0.00006 | 0.52            | -0.79   |
| 412.23  | 7.4  | C <sub>17</sub> H <sub>29</sub> N <sub>7</sub> O <sub>5</sub>   | Lys-Gln-His                                                                                                                  | 0.00019 | 0.20            | -0.67   |
| 289.151 | 10.7 | C <sub>11</sub> H <sub>20</sub> N <sub>4</sub> O <sub>5</sub>   | Ala-Ala-Gln                                                                                                                  | 0.00005 | 0.37            | -0.82   |
| 484.31  | 4.4  | C <sub>26</sub> H <sub>45</sub> NO <sub>5</sub> S               | [ST hydrox] N-(3alpha-hydroxy-5beta-cholan-24-oyl)-taurine                                                                   | 0.00771 | 0.53            | -0.60   |
| 242.066 | 19.5 | C <sub>10</sub> H <sub>11</sub> NO <sub>6</sub>                 | N-(2,3-Dihydroxybenzoyl)-L-serine                                                                                            | 0.00005 | 0.20            | -0.82   |
| 228.103 | 14.6 | C <sub>14</sub> H <sub>15</sub> NO <sub>2</sub>                 | thyronamine                                                                                                                  | 0.00226 | 0.45            | -0.66   |
| 301.18  | 8.3  | C <sub>19</sub> H <sub>24</sub> O <sub>3</sub>                  | 19-Oxoandrost-4-ene-3,17-dione                                                                                               | 0.00001 | 0.39            | -0.82   |
| 386.255 | 5.3  | C <sub>21</sub> H <sub>31</sub> N <sub>5</sub> O <sub>2</sub>   | Buspirone                                                                                                                    | 0.00006 | 0.41            | -0.82   |
| 296.091 | 16.0 | C <sub>9</sub> H <sub>17</sub> N <sub>3</sub> O <sub>6</sub> S  | Cys-Ser-Ser                                                                                                                  | 0.00022 | 0.42            | -0.80   |
| 221.081 | 11.4 | C <sub>12</sub> H <sub>14</sub> O <sub>4</sub>                  | [FA (12:4/2:0)] 2E,4E,8E,10E-Dodecatetraenedioic acid                                                                        | 0.00116 | 0.44            | -0.69   |
| 204.052 | 15.0 | C <sub>8</sub> H <sub>15</sub> NOS <sub>2</sub>                 | Lipoamide                                                                                                                    | 0.00189 | 0.46            | -0.67   |
| 421.191 | 5.2  | C <sub>20</sub> H <sub>28</sub> N <sub>4</sub> O <sub>4</sub> S | Leu-Trp-Cys                                                                                                                  | 0.00013 | 0.30            | -0.86   |
| 423.201 | 5.9  | C <sub>22</sub> H <sub>30</sub> O <sub>8</sub>                  | Valtratum                                                                                                                    | 0.00004 | 0.30            | -0.90   |
| 230.186 | 16.2 | C <sub>11</sub> H <sub>23</sub> N <sub>3</sub> O <sub>2</sub>   | N1,N8-diacetylspermidine                                                                                                     | 0.00158 | 0.43            | -0.70   |
| 402.198 | 15.0 | C <sub>16</sub> H <sub>27</sub> N <sub>5</sub> O <sub>7</sub>   | Ala-Gln-Pro-Ser                                                                                                              | 0.00014 | 0.24            | -0.75   |
| 189.076 | 14.8 | C <sub>8</sub> H <sub>14</sub> O <sub>5</sub>                   | (R)-3-((R)-3-Hydroxybutanoyloxy)butanoate                                                                                    | 0.00044 | 0.46            | -0.73   |
| 321.161 | 8.8  | C <sub>19</sub> H <sub>25</sub> O <sub>2</sub> Cl               | 11beta-Chloromethylestradiol                                                                                                 | 0.00007 | 0.38            | -0.82   |
| 506.296 | 4.8  | C <sub>25</sub> H <sub>39</sub> N <sub>5</sub> O <sub>6</sub>   | Asn-Leu-Leu-Phe                                                                                                              | 0.00008 | 0.32            | -0.81   |
| 225.088 | 5.1  | C <sub>10</sub> H <sub>12</sub> N <sub>2</sub> O <sub>4</sub>   | 3-Hydroxy-L-kynurenine                                                                                                       | 0.00001 | 0.36            | -0.85   |
| 418.28  | 8.2  | C <sub>21</sub> H <sub>39</sub> NO <sub>7</sub>                 | [SP amino, trihydroxy, hydroxy, methyl, oxo(20:0)] 2S-amino-3R,4R,5S-trihydroxy-2-(hydroxymethyl)-14-oxo-eicos-6E-enoic acid | 0.00001 | 0.31            | -0.84   |
| 244.058 | 15.8 | C <sub>8</sub> H <sub>11</sub> N <sub>3</sub> O <sub>6</sub>    | 6-aza-uridine                                                                                                                | 0.00037 | 0.16            | -0.76   |
| 676.32  | 5.0  | C <sub>33</sub> H <sub>41</sub> N <sub>9</sub> O <sub>7</sub>   | Glu-Trp-Trp-Arg                                                                                                              | 0.00425 | 0.48            | -0.63   |
| 504.282 | 4.6  | C <sub>25</sub> H <sub>37</sub> N <sub>5</sub> O <sub>6</sub>   | Gln-Leu-Phe-Pro                                                                                                              | 0.00000 | 0.30            | -0.88   |
| 399.123 | 15.6 | C <sub>25</sub> H <sub>20</sub> O <sub>5</sub>                  | [Fv methoxy, methox] (S)-2,3-Dihydro-7-methoxy-2-[2-(4-methoxyphenyl)-5-benzofuranyl]-4H-1-benzopyran-4-one                  | 0.10096 | 0.42            | -0.62   |
| 233.124 | 11.9 | C <sub>8</sub> H <sub>16</sub> N <sub>4</sub> O <sub>4</sub>    | (3R)-hydroxy-N-acetyl-(L)-arginine                                                                                           | 0.00012 | 0.25            | -0.80   |
| 454.256 | 9.1  | C <sub>20</sub> H <sub>40</sub> NO <sub>8</sub> P               | [PC (6:0/6:0)] 1,2-dihexanoyl-sn-glycero-3-phosphocholine                                                                    | 0.00237 | 0.21            | -0.72   |
| 472.209 | 11.0 | C <sub>17</sub> H <sub>29</sub> N <sub>9</sub> O <sub>5</sub> S | Arg-Cys-Gly-His                                                                                                              | 0.00031 | 0.22            | -0.68   |
| 290.16  | 13.0 | C <sub>13</sub> H <sub>23</sub> NO <sub>6</sub>                 | 3-Methylglutaryl carnitine                                                                                                   | 0.00007 | 0.28            | -0.83   |

Table S3. Cont.

| m/z     | Rt   | Molecular Formula                                               | Metabolite                                                                       | p-Value | Ratio D1S3/D1S1 | p(corr) |
|---------|------|-----------------------------------------------------------------|----------------------------------------------------------------------------------|---------|-----------------|---------|
| 514.265 | 8.3  | C <sub>26</sub> H <sub>35</sub> N <sub>5</sub> O <sub>6</sub>   | Lys-Phe-Gly-Tyr                                                                  | 0.00005 | 0.28            | -0.85   |
| 384.122 | 15.2 | C <sub>16</sub> H <sub>21</sub> N <sub>3</sub> O <sub>6</sub> S | Phe-Asp-Cys                                                                      | 0.00000 | 0.28            | -0.85   |
| 330.165 | 7.5  | C <sub>14</sub> H <sub>23</sub> N <sub>3</sub> O <sub>6</sub>   | Val-Asp-Pro                                                                      | 0.00013 | 0.32            | -0.87   |
| 517.321 | 4.6  | C <sub>20</sub> H <sub>40</sub> N <sub>10</sub> O <sub>6</sub>  | Arg-Val-Ser-Arg                                                                  | 0.00012 | 0.31            | -0.81   |
| 516.317 | 4.6  | C <sub>27</sub> H <sub>41</sub> N <sub>5</sub> O <sub>5</sub>   | Ile-Trp-Val-Val                                                                  | 0.00009 | 0.31            | -0.86   |
| 478.277 | 4.7  | C <sub>22</sub> H <sub>35</sub> N <sub>7</sub> O <sub>5</sub>   | Arg-Phe-Val-Gly                                                                  | 0.00014 | 0.30            | -0.82   |
| 466.251 | 8.2  | C <sub>19</sub> H <sub>31</sub> N <sub>9</sub> O <sub>5</sub>   | Arg-Gly-Pro-His                                                                  | 0.00222 | 0.24            | -0.63   |
| 376.193 | 13.3 | C <sub>13</sub> H <sub>25</sub> N <sub>7</sub> O <sub>6</sub>   | Asn-Ser-Arg                                                                      | 0.00139 | 0.18            | -0.70   |
| 206.102 | 14.2 | C <sub>8</sub> H <sub>15</sub> NO <sub>5</sub>                  | N-Acetyl-D-fucosamine                                                            | 0.00007 | 0.24            | -0.83   |
| 260.067 | 8.9  | C <sub>10</sub> H <sub>14</sub> NO <sub>5</sub> P               | p-Nitrophenyl-O-ethyl ethylphosphonate                                           | 0.00001 | 0.22            | -0.91   |
| 242.066 | 14.1 | C <sub>10</sub> H <sub>11</sub> NO <sub>6</sub>                 | N-(2,3-Dihydroxybenzoyl)-L-serine                                                | 0.00374 | 0.28            | -0.62   |
| 496.276 | 8.8  | C <sub>23</sub> H <sub>37</sub> N <sub>5</sub> O <sub>7</sub>   | Lys-Phe-Thr-Thr                                                                  | 0.00082 | 0.12            | -0.59   |
| 398.289 | 6.0  | C <sub>22</sub> H <sub>39</sub> NO <sub>5</sub>                 | [FA trihydroxy(2:0)] N-(9S,11R,15S-trihydroxy-5Z,13E-prostadienoyl)-ethanolamine | 0.00046 | 0.24            | -0.79   |
| 424.183 | 14.7 | C <sub>18</sub> H <sub>25</sub> N <sub>5</sub> O <sub>7</sub>   | Asn-Gln-Tyr                                                                      | 0.00239 | 0.16            | -0.62   |
| 506.194 | 5.1  | C <sub>19</sub> H <sub>33</sub> N <sub>5</sub> O <sub>9</sub> S | Asp-Lys-Met-Asp                                                                  | 0.03757 | 0.30            | -0.56   |
| 167.038 | 12.6 | C <sub>5</sub> H <sub>12</sub> SO <sub>4</sub>                  | dihydroxypentenyl sulfate                                                        | 0.00000 | 0.30            | -0.78   |
| 504.266 | 8.9  | C <sub>21</sub> H <sub>37</sub> N <sub>5</sub> O <sub>9</sub>   | Glu-Leu-Lys-Asp                                                                  | 0.00037 | 0.28            | -0.84   |
| 328.161 | 11.0 | C <sub>13</sub> H <sub>21</sub> N <sub>5</sub> O <sub>5</sub>   | Thr-Ala-His                                                                      | 0.00036 | 0.26            | -0.62   |
| 260.115 | 13.7 | C <sub>11</sub> H <sub>19</sub> NO <sub>6</sub>                 | Lotaustralin                                                                     | 0.00379 | 0.29            | -0.71   |
| 327.073 | 17.2 | C <sub>14</sub> H <sub>16</sub> O <sub>9</sub>                  | 2-Succinyl-5-enolpyruvyl-6-hydroxy-3-cyclohexene-1-carboxylate                   | 0.00157 | 0.30            | -0.66   |
| 334.182 | 5.0  | C <sub>22</sub> H <sub>25</sub> NO <sub>2</sub>                 | Lobelanine                                                                       | 0.02840 | 0.31            | -0.57   |
| 257.165 | 5.3  | C <sub>16</sub> H <sub>20</sub> N <sub>2</sub> O                | Chanoclavine-I                                                                   | 0.00100 | 0.23            | -0.72   |
| 305.045 | 13.2 | C <sub>18</sub> H <sub>10</sub> O <sub>5</sub>                  | [Fv Methyl] 3',4'-Methylenedioxyfurano[2'',3''':6,7]aurone                       | 0.00457 | 0.26            | -0.71   |
| 357.083 | 18.8 | C <sub>15</sub> H <sub>18</sub> O <sub>10</sub>                 | dihydroxyphenylpropionic acid glucuronide                                        | 0.00606 | 0.35            | -0.68   |
| 320.092 | 12.0 | C <sub>11</sub> H <sub>19</sub> N <sub>3</sub> O <sub>6</sub> S | gamma-L-Glutamyl-L-cysteinyl-beta-alanine                                        | 0.00142 | 0.29            | -0.69   |
| 490.265 | 5.6  | C <sub>24</sub> H <sub>35</sub> N <sub>5</sub> O <sub>6</sub>   | Ala-Leu-Thr-Trp                                                                  | 0.00036 | 0.23            | -0.76   |
| 784.586 | 4.1  | C <sub>44</sub> H <sub>82</sub> NO <sub>8</sub> P               | PC(18:2(9Z,12Z)/18:1(9Z))                                                        | 0.00384 | 0.31            | -0.65   |
| 336.164 | 14.5 | C <sub>14</sub> H <sub>25</sub> NO <sub>8</sub>                 | validoxylamine A                                                                 | 0.00336 | 0.15            | -0.73   |
| 293.087 | 15.8 | C <sub>11</sub> H <sub>18</sub> O <sub>9</sub>                  | Tuliposide B                                                                     | 0.00635 | 0.28            | -0.59   |
| 333.076 | 17.3 | C <sub>20</sub> H <sub>14</sub> O <sub>5</sub>                  | 19-Hydroxy-8-O-methyltetrangulol                                                 | 0.00684 | 0.09            | -0.58   |
| 283.059 | 21.2 | C <sub>16</sub> H <sub>10</sub> O <sub>5</sub>                  | [Fv Methyl,hydrox] 4,5-Methylenedioxy-6-hydroxyaurone                            | 0.01252 | 0.28            | -0.56   |
| 554.296 | 5.2  | C <sub>29</sub> H <sub>39</sub> N <sub>5</sub> O <sub>6</sub>   | Gln-Leu-Phe-Phe                                                                  | 0.00302 | 0.25            | -0.77   |



Table S3. Cont.

| m/z     | Rt   | Molecular Formula                                               | Metabolite                                                                      | p-Value | Ratio D1S3/D1S1 | p(corr) |
|---------|------|-----------------------------------------------------------------|---------------------------------------------------------------------------------|---------|-----------------|---------|
| 310.071 | 16.0 | C <sub>17</sub> H <sub>11</sub> NO <sub>5</sub>                 | N-(6-Oxo-6H-dibenzo[b,d]pyran-3-yl)maleamic acid                                | 0.00037 | 0.26            | -0.84   |
| 328.115 | 12.1 | C <sub>11</sub> H <sub>22</sub> NO <sub>8</sub> P               | [PC acety] 1-acetyl-2-formyl-sn-glycero-3-phosphocholine                        | 0.00044 | 0.15            | -0.71   |
| 260.078 | 17.6 | C <sub>10</sub> H <sub>15</sub> NO <sub>7</sub>                 | Hymexazol O-glucoside                                                           | 0.00095 | 0.29            | -0.70   |
| 534.314 | 5.7  | C <sub>24</sub> H <sub>39</sub> N <sub>9</sub> O <sub>5</sub>   | His-Leu-Lys-His                                                                 | 0.00276 | 0.25            | -0.78   |
| 281.106 | 13.5 | C <sub>11</sub> H <sub>20</sub> O <sub>6</sub> S                | isopropyl 6-O-acetyl-&beta;-D-thiogalactopyranoside                             | 0.00005 | 0.18            | -0.77   |
| 454.139 | 4.1  | C <sub>18</sub> H <sub>25</sub> N <sub>5</sub> O <sub>7</sub> S | Asn-Cys-Gly-Tyr                                                                 | 0.00801 | 0.22            | -0.62   |
| 219.061 | 12.5 | C <sub>7</sub> H <sub>12</sub> N <sub>2</sub> O <sub>6</sub>    | Asp-Ser                                                                         | 0.00010 | 0.22            | -0.74   |
| 556.313 | 5.1  | C <sub>29</sub> H <sub>41</sub> N <sub>5</sub> O <sub>6</sub>   | Lys-Phe-Val-Tyr                                                                 | 0.00018 | 0.26            | -0.88   |
| 788.618 | 4.1  | C <sub>44</sub> H <sub>86</sub> NO <sub>8</sub> P               | [PC (18:0/18:1)] 1-octadecanoyl-2-(9Z-octadecenoyl)-sn-glycero-3-phosphocholine | 0.00326 | 0.22            | -0.65   |
| 362.15  | 12.1 | C <sub>13</sub> H <sub>25</sub> N <sub>5</sub> O <sub>5</sub> S | Lys-Asn-Cys                                                                     | 0.00181 | 0.18            | -0.77   |
| 167.036 | 12.8 | C <sub>8</sub> H <sub>8</sub> O <sub>4</sub>                    | [PK] Orsellinic acid                                                            | 0.00081 | 0.28            | -0.74   |
| 276.017 | 15.9 | C <sub>9</sub> H <sub>9</sub> NSO <sub>7</sub>                  | dihydrodopachrome sulfate                                                       | 0.00364 | 0.16            | -0.56   |
| 338.144 | 14.7 | C <sub>13</sub> H <sub>23</sub> NO <sub>9</sub>                 | Streptobiosamine                                                                | 0.00018 | 0.10            | -0.54   |
| 237.079 | 13.7 | C <sub>9</sub> H <sub>16</sub> O <sub>5</sub> S                 | 2-(4'-methylthio)butylmalate                                                    | 0.00393 | 0.15            | -0.61   |
| 243.1   | 4.0  | C <sub>10</sub> H <sub>16</sub> N <sub>2</sub> O <sub>5</sub>   | Glu-Pro                                                                         | 0.06619 | 0.34            | -0.58   |
| 501.307 | 4.6  | C <sub>26</sub> H <sub>44</sub> O <sub>9</sub>                  | Mupirocin                                                                       | 0.00176 | 0.30            | -0.65   |
| 309.16  | 7.3  | C <sub>19</sub> H <sub>22</sub> N <sub>2</sub> O <sub>2</sub>   | Sarpagine                                                                       | 0.05433 | 0.35            | -0.67   |
| 259.098 | 4.3  | C <sub>15</sub> H <sub>16</sub> O <sub>4</sub>                  | [PR] Hemigossypol                                                               | 0.01189 | 0.31            | -0.65   |
| 583.312 | 11.5 | C <sub>30</sub> H <sub>48</sub> O <sub>11</sub>                 | Cholicacidglucuronide                                                           | 0.00590 | 0.17            | -0.56   |

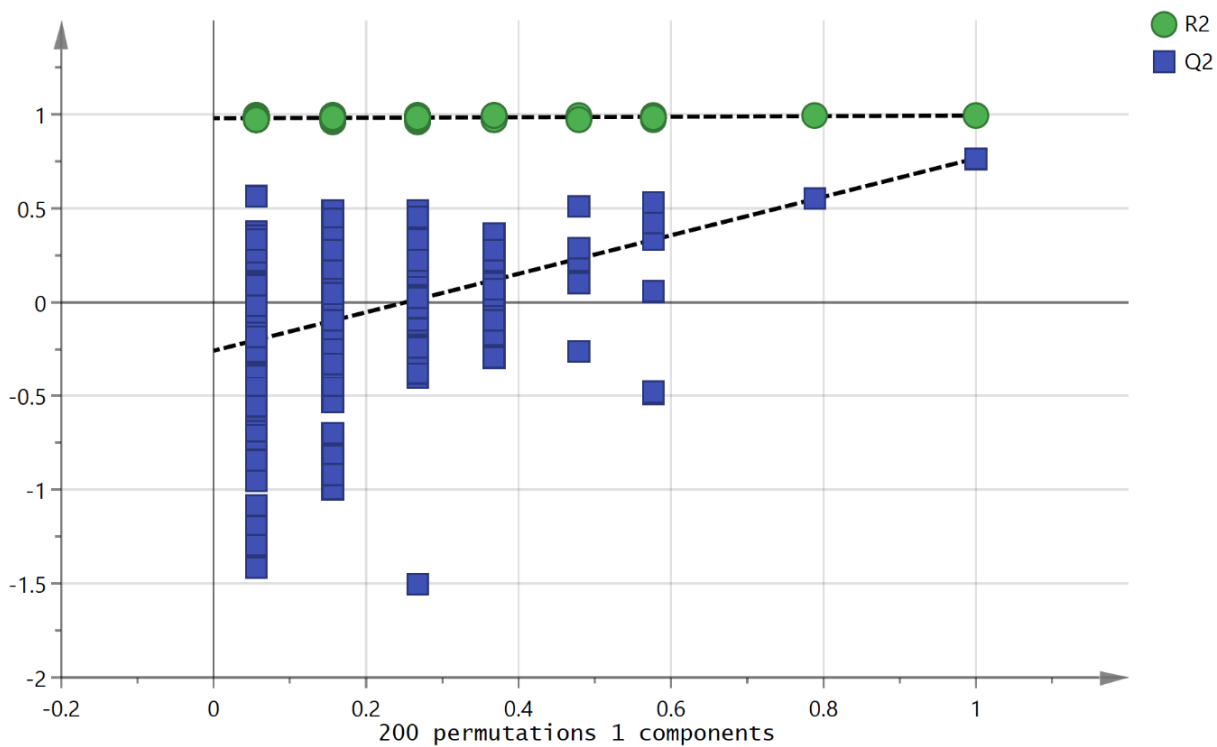

**Figure S1.** Cross validation model for the classification of D2S1S3 by OPLSDA.

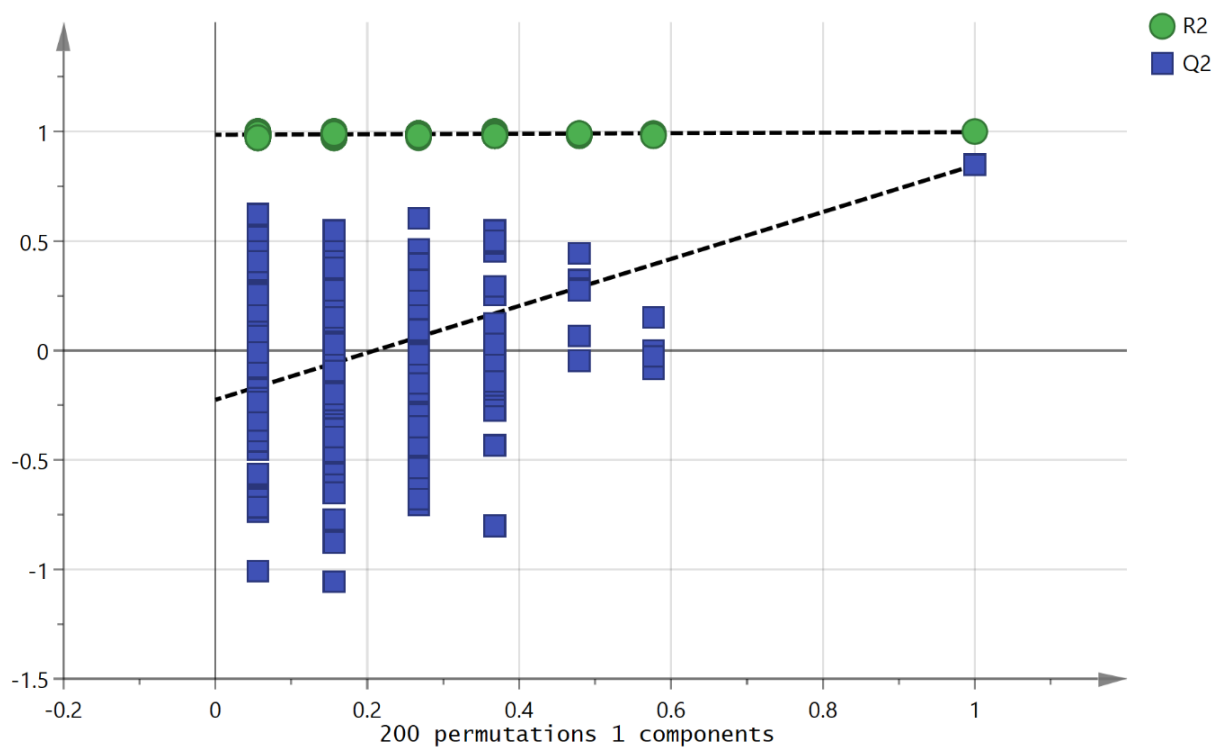

**Figure S2.** Cross validation of the separation of D1S1 and D1S3 by OPLSDA.

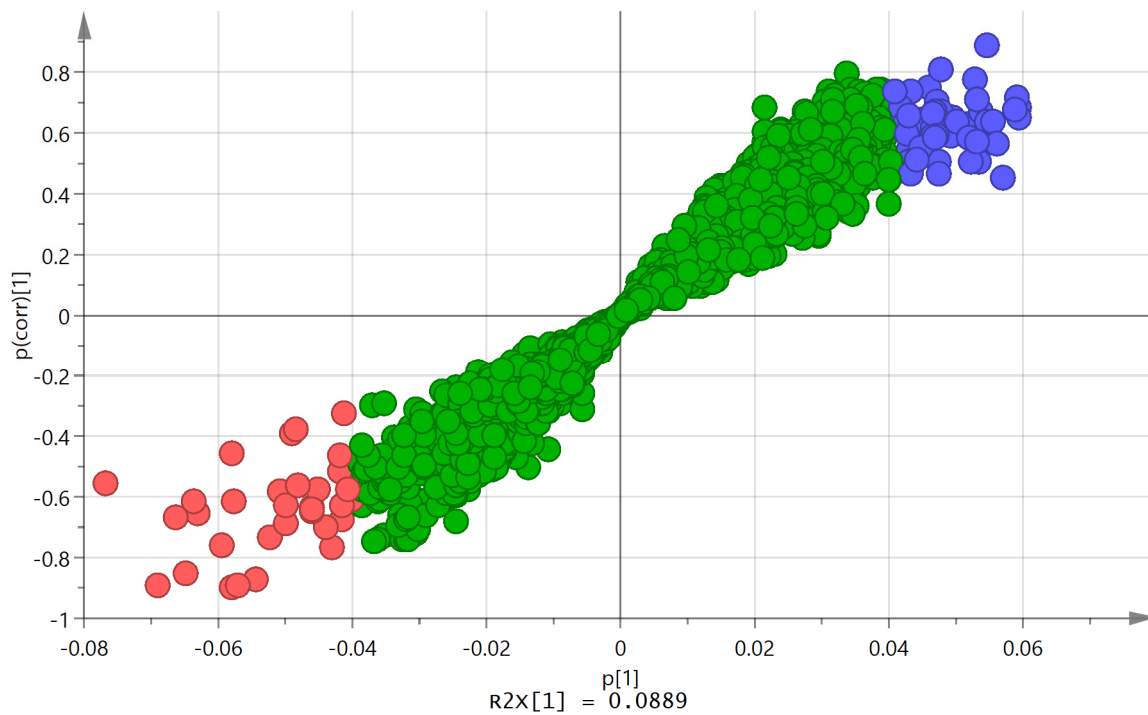

**Figure S3.** S-plot for OPLSDA model of D2S3 vs D2S1 highlighting the metabolites listed in Table S1.

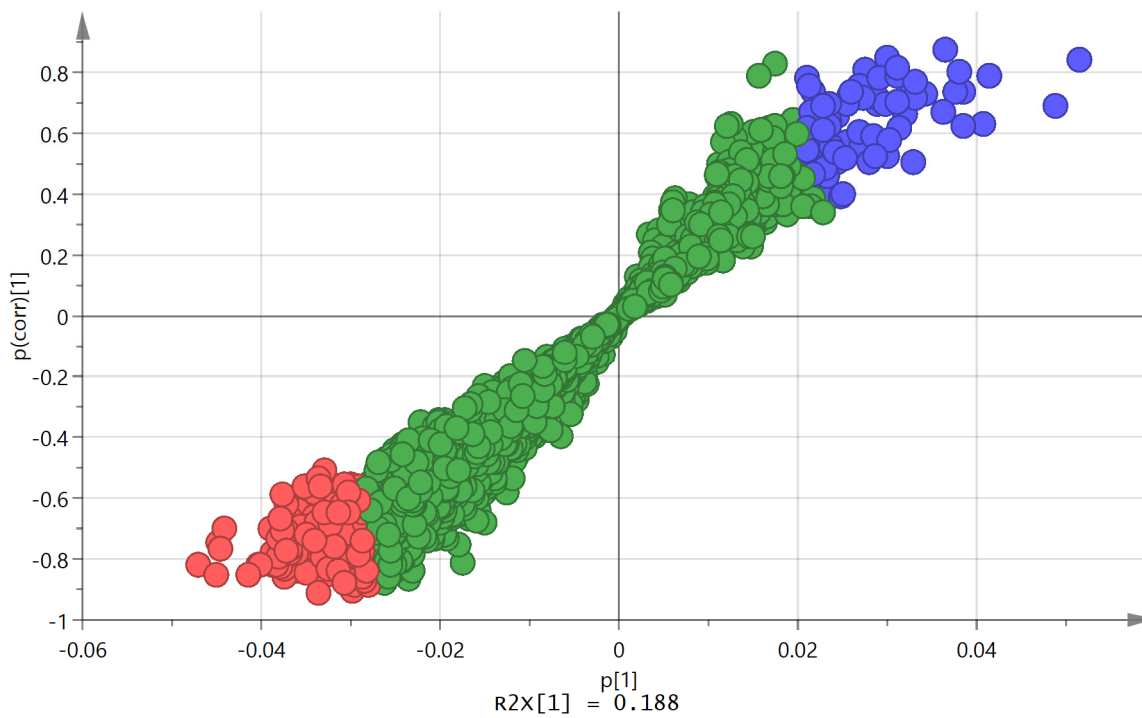

**Figure S4.** S-plot for OPLSDA model of D1S3 vs D1S1 highlighting the metabolites listed in Table S2.

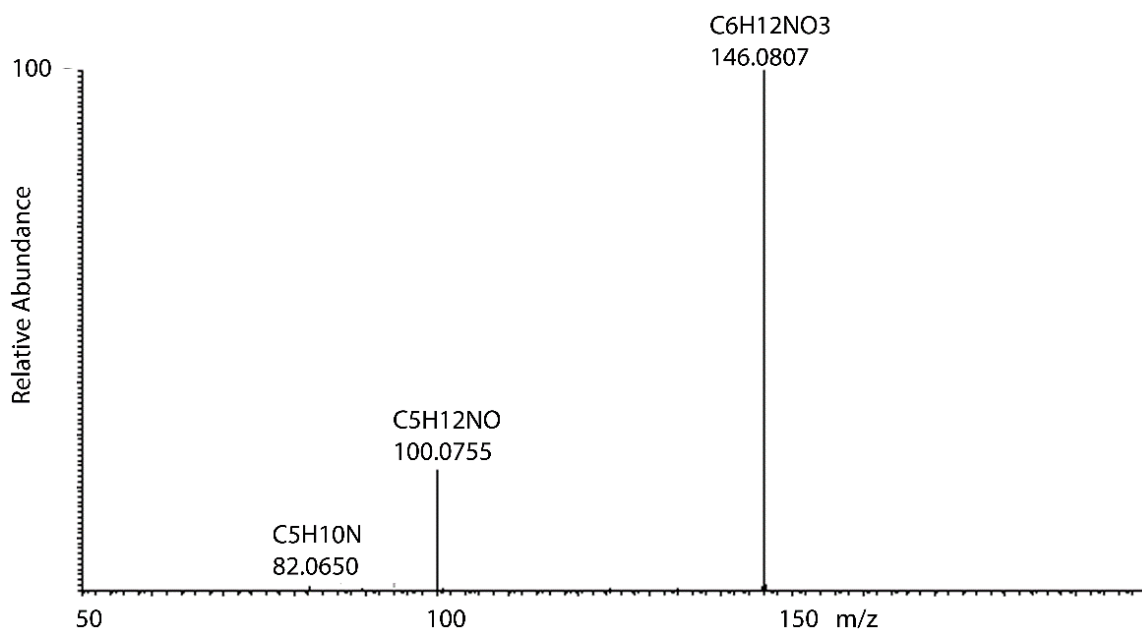

**Figure S5.** MS2 of oxoaminohexanoic acid obtained with a collision energy of 35V.

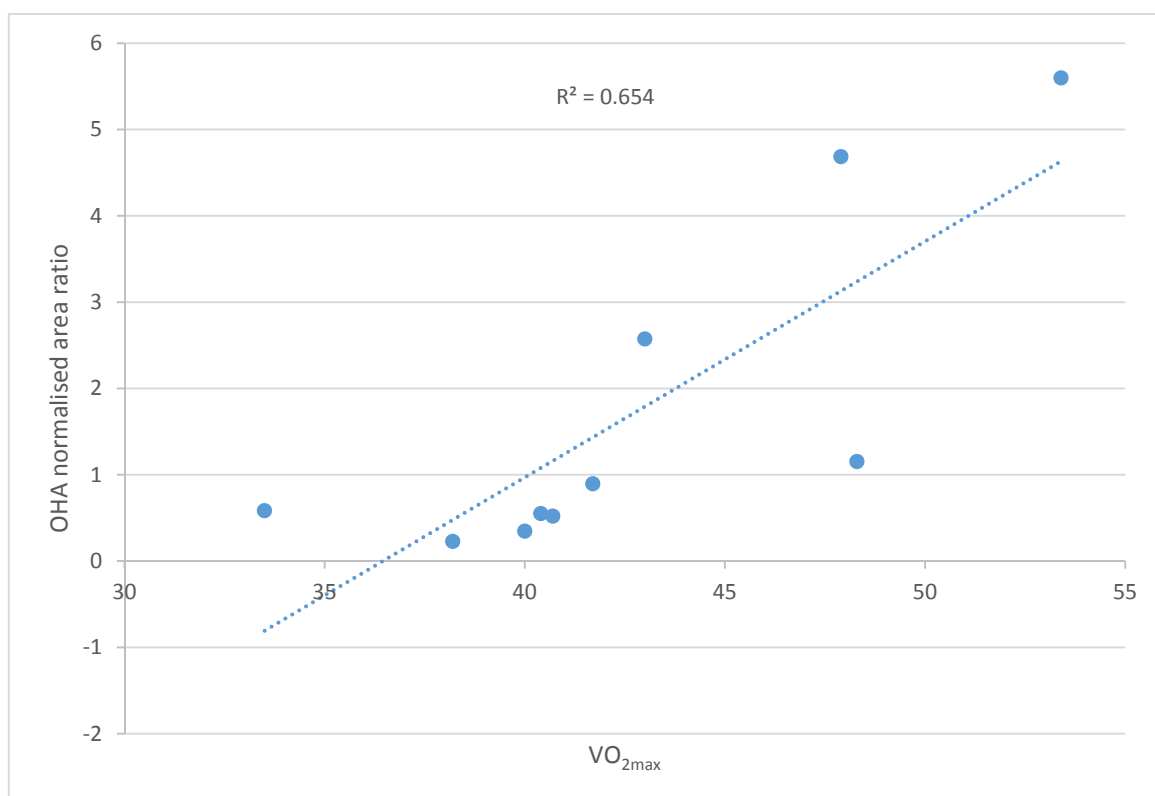

**Figure S6.** Plot of (area OHA D2S3/area OHA isomer D2S3)/( area OHA D2S1/area OHA isomer D2S1).
